# Supplementary material for: Ring-chain equilibria of dynamic macrocycles with a bis(hindered amino)disulfide linker
Source: Royal Society of Chemistry journal article supplement (doi:10.1039/d3py00808h), 2023-01-01
Supplement: d3py00808h1.pdf [file d3py00808h1.pdf]

# Supporting Information

## Ring–Chain Equilibria of Dynamic Macrocycles with a Bis(hindered amino)disulfide Linker

Rikito Takashima,<sup>a</sup> Daisuke Aoki,<sup>\*b</sup> Shigeki Kuwata,<sup>c</sup> and Hideyuki Otsuka<sup>\*a</sup>

<sup>a</sup> *Department of Chemical Science and Engineering, Tokyo Institute of Technology, 2-12-1  
Ookayama, Meguro-ku, Tokyo 152-8550, Japan.*

<sup>b</sup> *Department of Applied Chemistry and Biotechnology, Graduate School of Engineering,  
Chiba University, 1-33 Yayoi-cho, Inage-ku, Chiba-shi, Chiba 263-8522, Japan.*

<sup>c</sup> *Department of Applied Chemistry, College of Life Sciences, Ritsumeikan University, 1-1-1  
Noji-higashi, Kusatsu, Shiga 525-8577, Japan*

### Corresponding Authors

\* D. Aoki. Email: daoki@chiba-u.jp

\* H. Otsuka. Email: otsuka@mac.titech.ac.jp

### Table of Contents

|                                                                             |    |
|-----------------------------------------------------------------------------|----|
| 1. Synthesis.....                                                           | 2  |
| 2. Characterization of LPs for cyclodepolymerization .....                  | 3  |
| 3. Reaction tracking of cyclodepolymerization behaviour.....                | 8  |
| 4. Estimation for enthalpy of ring–chain equilibria.....                    | 12 |
| 5. Characterization of isolated macocycles.....                             | 14 |
| 6. Polymerization of isolated macrocycles.....                              | 17 |
| 7. Optimized geometries from DFT calculation at UB3LYP/631g(d,p) level..... | 18 |

## 1. Synthesis

### BiTEMPS-diacrylate-S

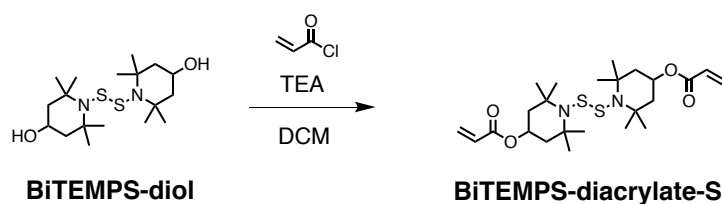

Triethylamine (8.50 mL, 61.0 mmol) was added to a solution of **BiTEMPS-diol** (3.00 g, 7.97 mmol) in 500 mL of dry  $\text{CH}_2\text{Cl}_2$  at 0 °C before acryloyl chloride (1.6 mL, 15.8 mmol) was carefully added. The reaction mixture was stirred for 2 hours at 0 °C, and for 18 hours at room temperature under an inert atmosphere. After the solvent was evaporated under reduced pressure, the residue was extracted with  $\text{CH}_2\text{Cl}_2$ . The organic layer was concentrated and purified by column chromatography on silica gel eluting with  $\text{CHCl}_3$ /hexane (7/6, v/v). The obtained eluate was evaporated under reduced pressure to afford **BiTEMPS-diacrylate-S** as a white solid (2.85 g, 74%).  $^1\text{H}$  NMR ( $\text{CDCl}_3$ ),  $\delta$  (ppm): 6.41-6.37 (d, 2H,  $-\text{CH}_2=\underline{\text{C}}\text{H}-\text{CO}-$ ), 6.06–6.13 (m, 2H,  $-\underline{\text{C}}\text{H}_2=\text{CH}-\text{CO}-$ ), 5.82–5.80 (d, 2H,  $-\underline{\text{C}}\text{H}_2=\text{CH}-\text{CO}-$ ), 5.14–5.21 (m, 2H,  $-\text{O}-\underline{\text{C}}\text{H}-$  ( $\text{CH}_2$ )<sub>2</sub>-), 2.01–1.97 (m, 4H,  $-\text{O}-\text{CH}-$  ( $\text{CH}_2$ )<sub>2</sub>-), 1.60–1.55 (m, 4H,  $-\text{O}-\text{CH}-$  ( $\text{CH}_2$ )<sub>2</sub>-), 1.46 (s, 6H,  $-\text{C}-\underline{\text{C}}\text{H}_3$ ), 1.25 (s, 6H,  $-\text{C}-\underline{\text{C}}\text{H}_3$ ),  $^{13}\text{C}$  { $^1\text{H}$ } NMR ( $\text{CDCl}_3$ ),  $\delta$  (ppm): 165.76, 130.69, 128.97, 67.32, 59.65, 45.78, 35.00, 26.84. FT-IR (KBr,  $\text{cm}^{-1}$ ): 2980, 1723, 1634, 1463, 1407, 1381, 1300, 1202, 986, 813, MS (ESI): 507.2309  $[\text{M}+\text{Na}]^+$ , calculated for  $\text{C}_{24}\text{H}_{40}\text{N}_2\text{O}_4\text{S}_2\text{Na}$   $[\text{M}+\text{Na}]^+$ : 507.2322.

## 2. Characterization of LPs for cyclization reaction

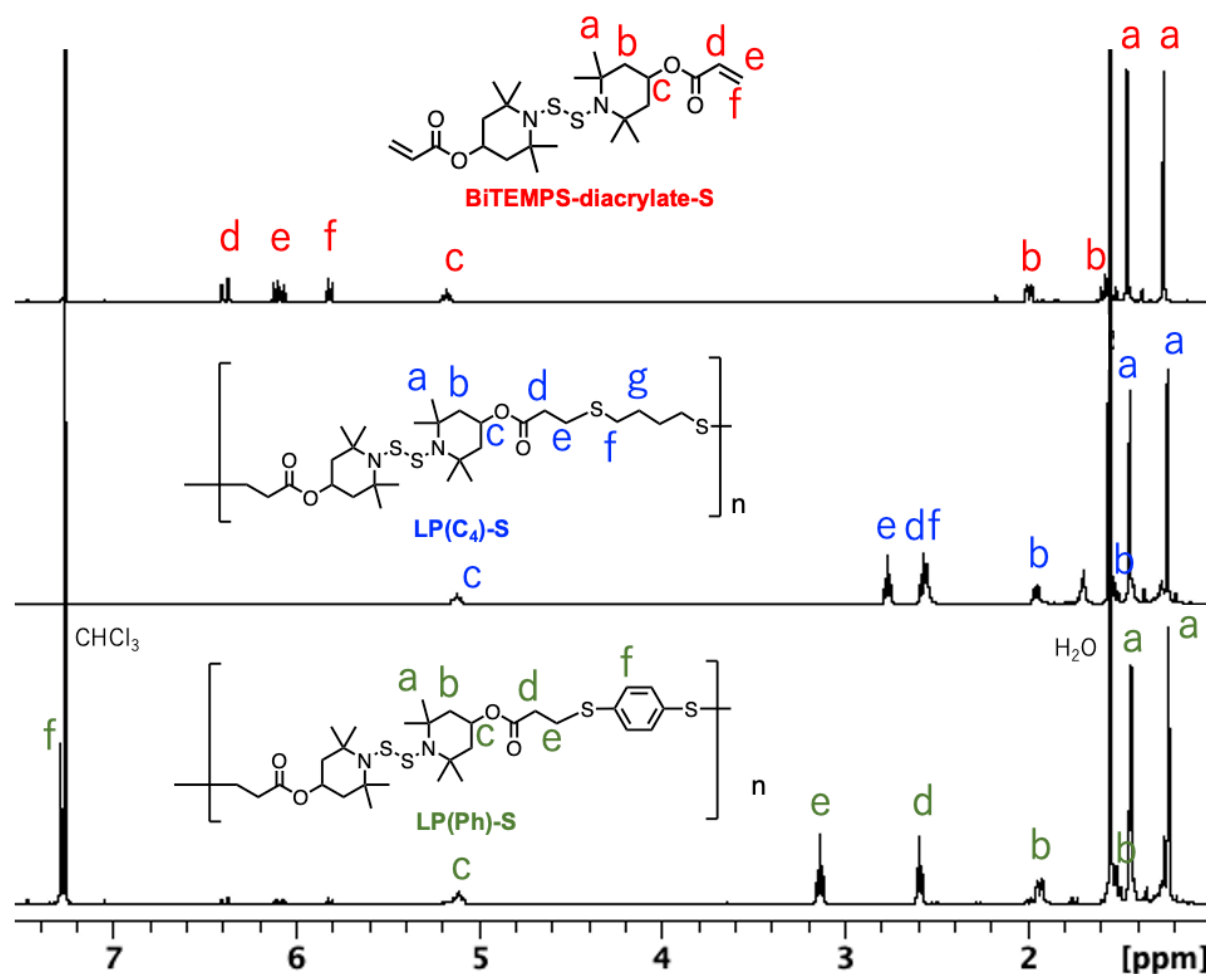

**Figure S1.** <sup>1</sup>H NMR spectra of BiTEMPS-diacrylate-S (red), LP(C<sub>4</sub>)-S (blue), and LP(Ph)-S (green) (500 MHz, 25 °C, CDCl<sub>3</sub>).

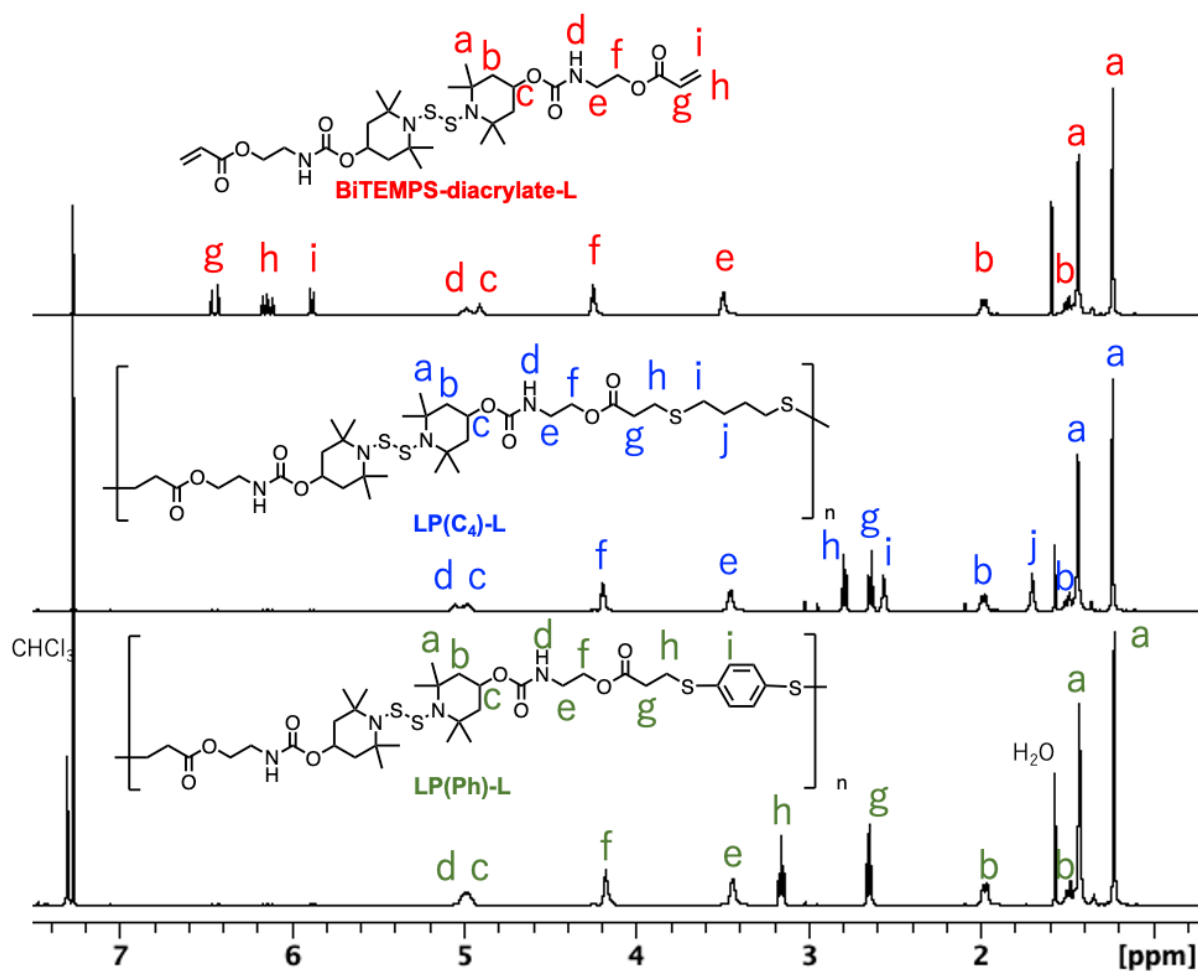

**Figure S2.**  $^1\text{H}$  NMR spectra of BiTEMPS-diacrylate-L (red), LP(C<sub>4</sub>)-L (blue), and LP(Ph)-L (green) (500 MHz, 25 °C,  $\text{CDCl}_3$ ).

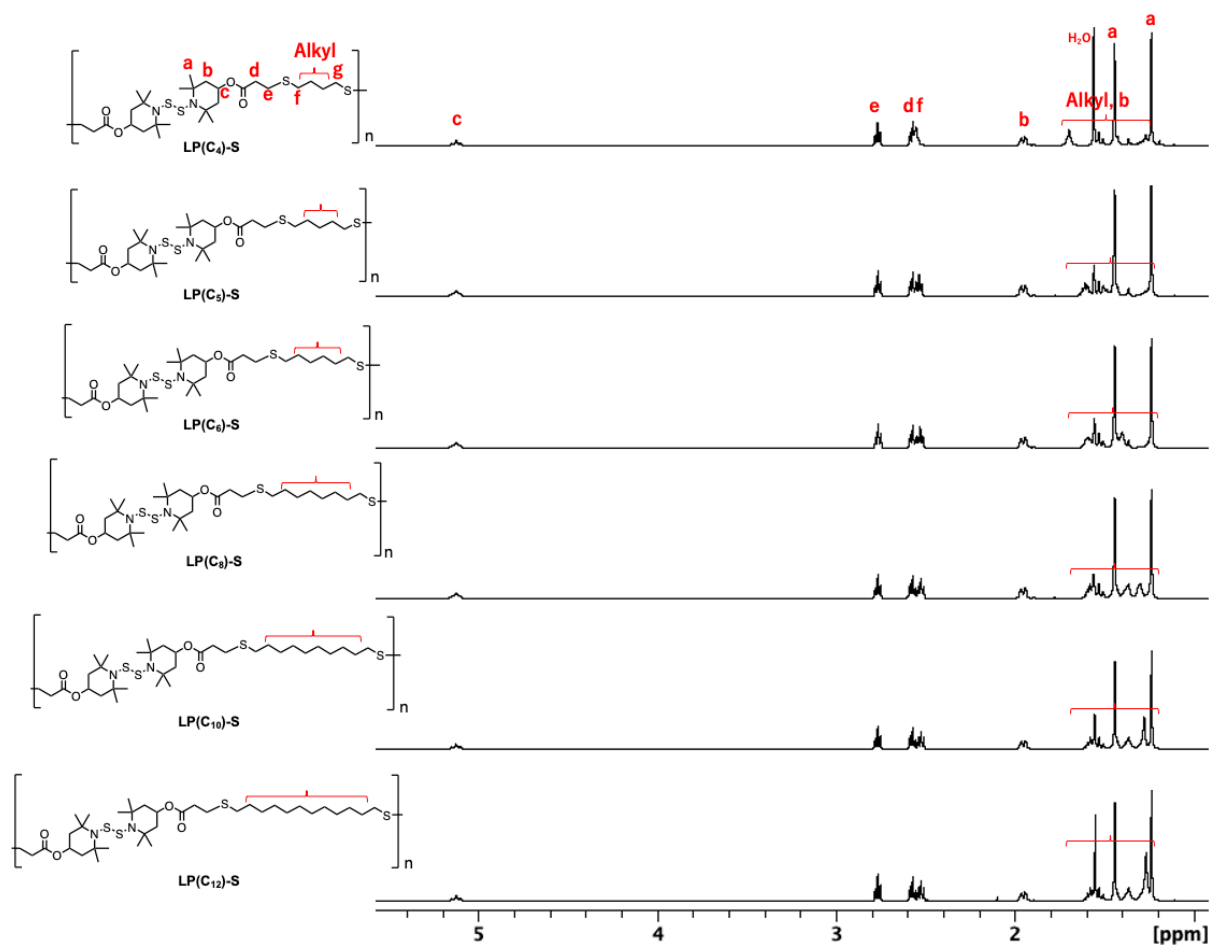

**Figure S3.**  $^1\text{H}$  NMR spectra of LP( $C_x$ )-S (500 MHz, 25 °C,  $\text{CDCl}_3$ ).

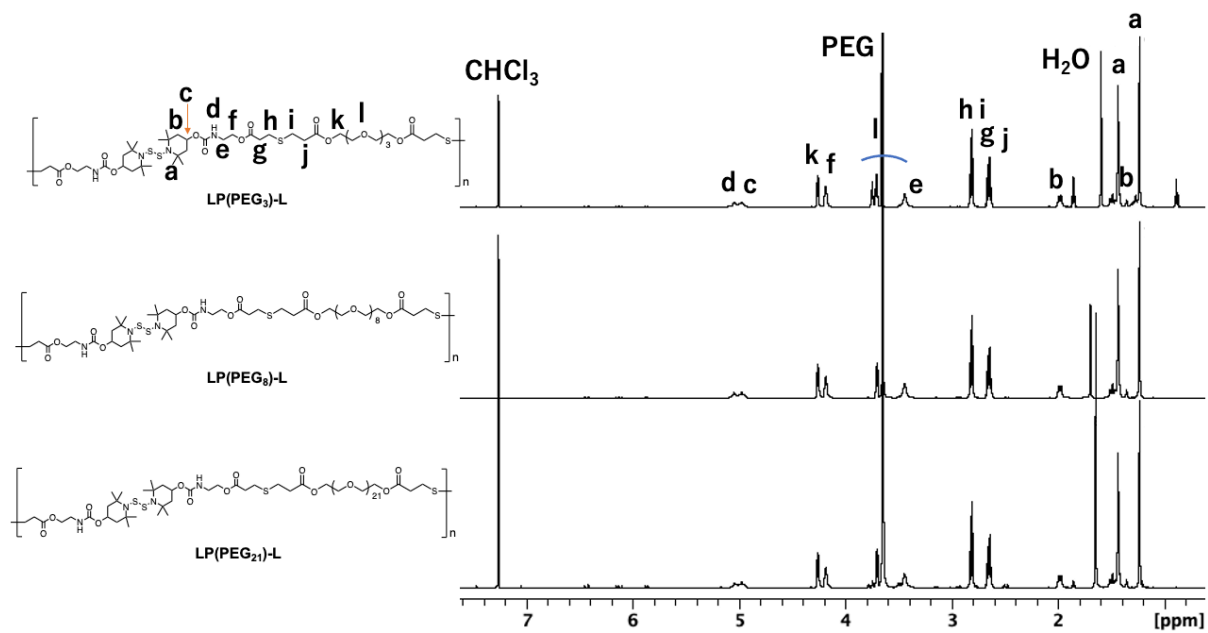

**Figure S4.**  $^1\text{H}$  NMR spectra of LP(PEG<sub>k</sub>)-L (500 MHz, 25 °C, CDCl<sub>3</sub>).

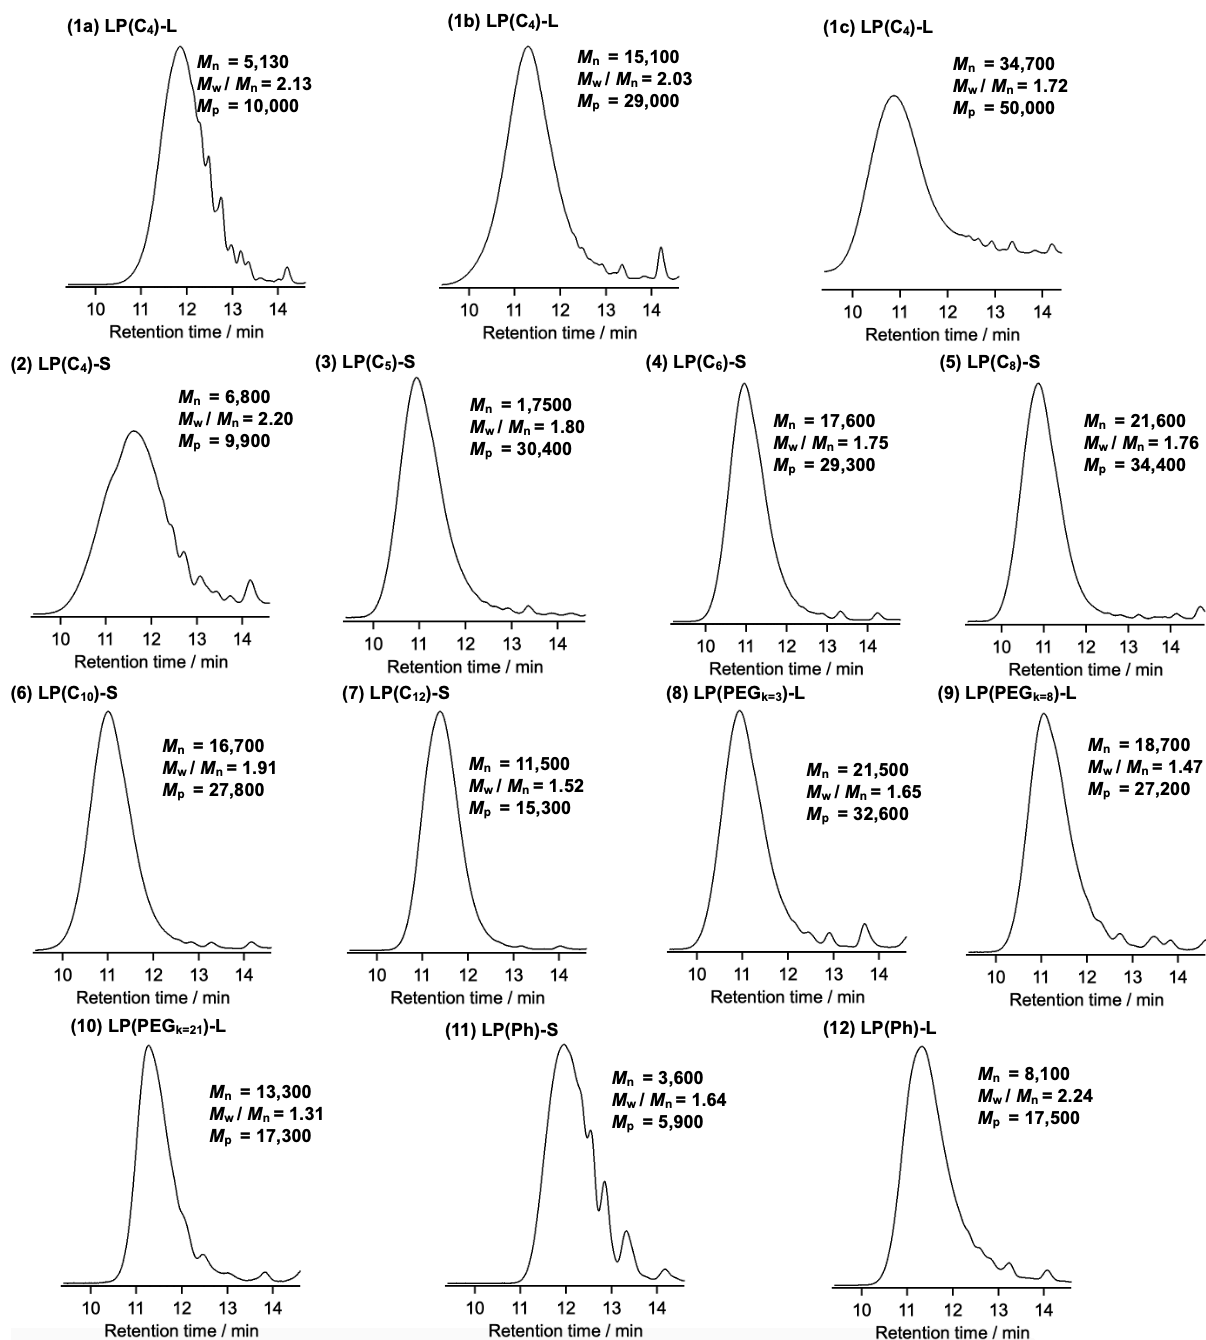

**Figure S5.** (a) GPC profiles of LPs (PS standard, eluent, THF; flow rate, 0.6 mL/min, detected by UV).

### 3. Reaction tracking of cyclization behaviour

The experiments on solvent dependence were performed using sample 1b at a concentration of 10 g/L. (Note that the other experiments were performed with concentrations in mol of repeating units)

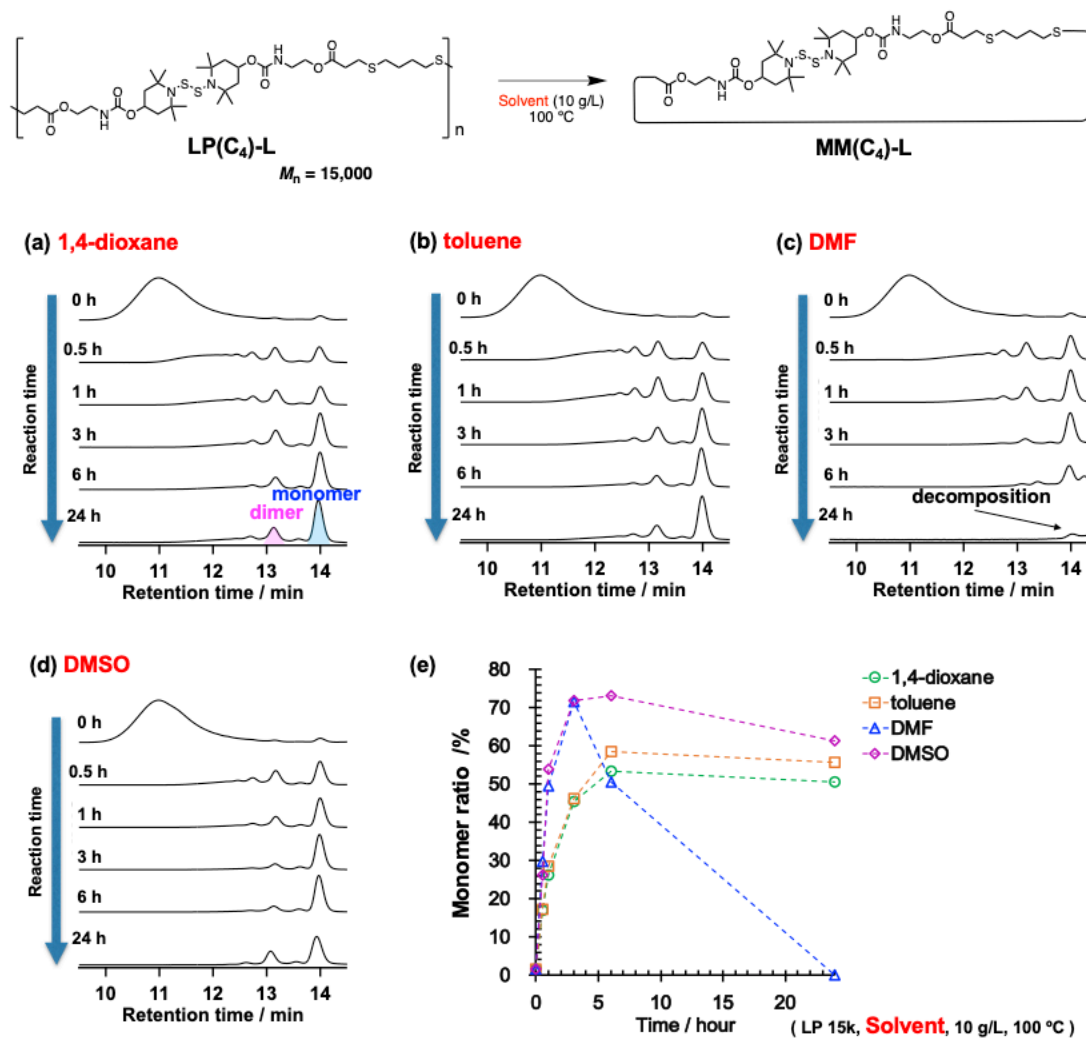

**Figure S6.** Solvent dependences of producing ratio of MM(C<sub>4</sub>)-L at cyclodepolymerization at 100 °C at 10 g/L and changes in GPC profile at cyclodepolymerization (PS standard, eluent, THF; flow rate, 0.6 mL/min, detected by UV). (a) 1,4-dioxane, (b) toluene, (c) DMF, and (d) DMSO. (e) Monomer ratio during the cyclodepolymerization.



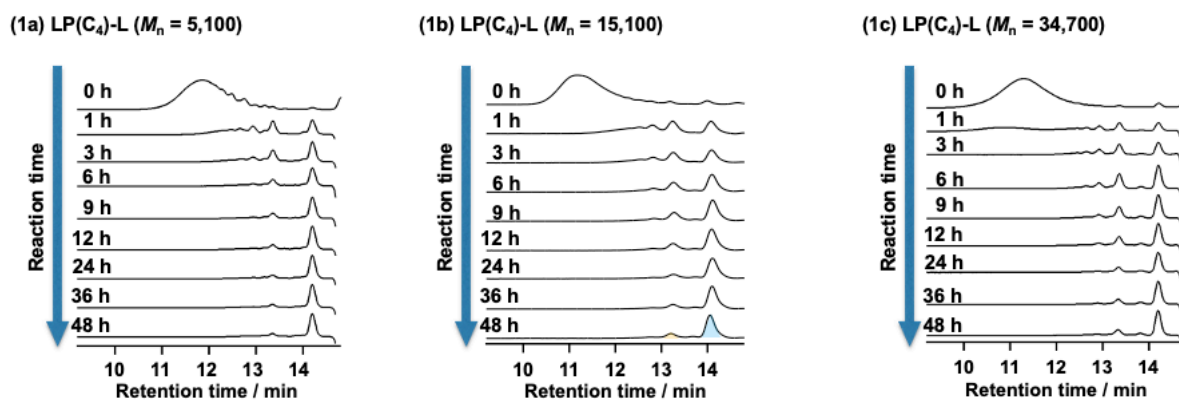

**Figure S7.** LP's molar weight dependences of producing ratio of **MM(C<sub>4</sub>)-L** at cyclodepolymerization in toluene at 10 mM at 100 °C and changes in GPC profiles at cyclodepolymerization (PS standard, eluent, THF; flow rate, 0.6 mL/min, detected by UV). (a)  $M_n = 5100$ , (b)  $M_n = 15100$ , and (c)  $M_n = 34700$ .

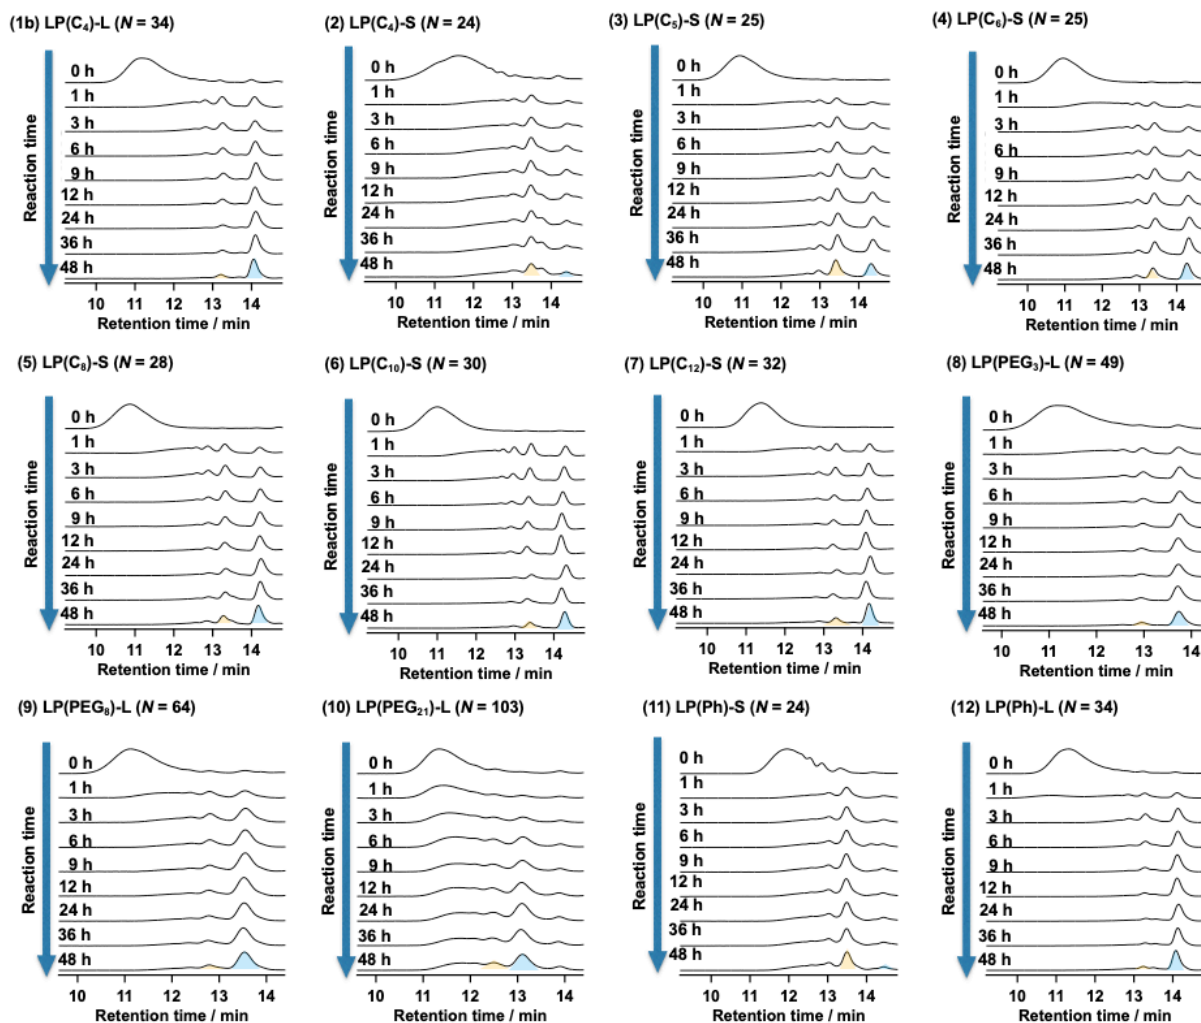

**Figure S8.** Changes in GPC profile at cyclodepolymerization of LPs (10 mM) (PS standard, eluent, THF; flow rate, 0.6 mL/min, detected by UV).

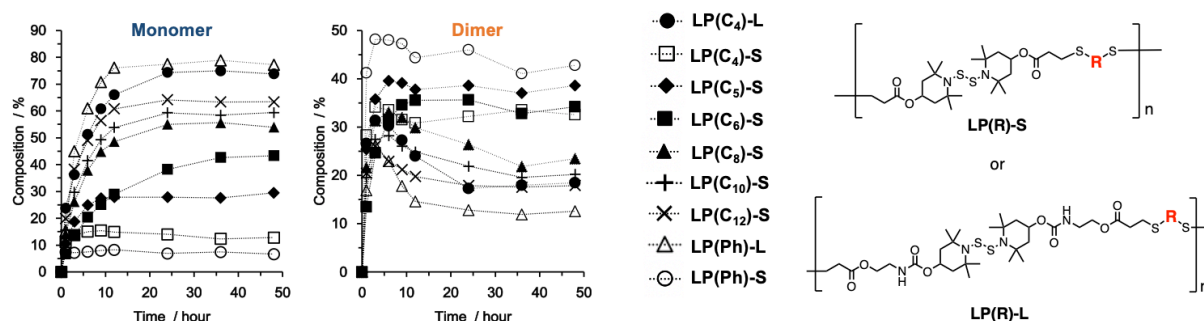

**Figure S9.** Changes in composition ratio of macrocyclic monomers and dimers during depolymerization reactions of samples 1b to 7, 11, and 12.

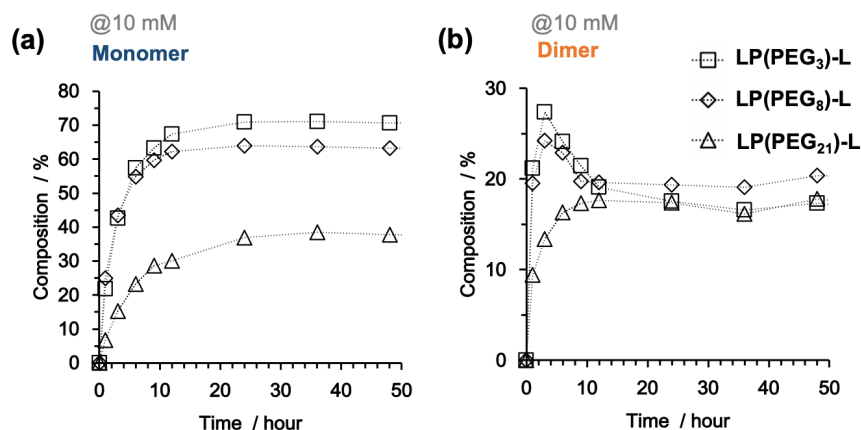

**Figure S10.** Changes in composition ratio of macrocyclic monomer and dimer during cyclodepolymerization of samples 8 to 10.

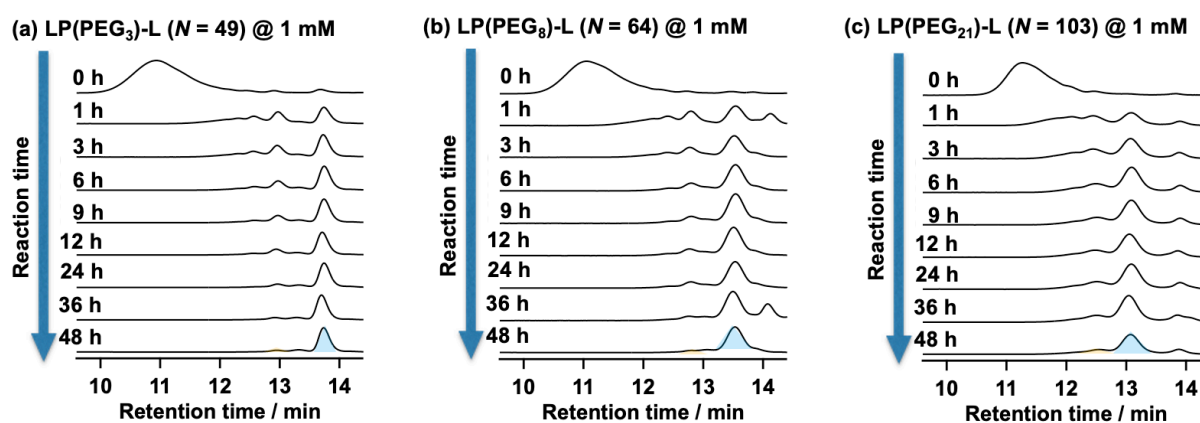

**Figure S11.** Changes in GPC profile at cyclodepolymerization of LP(PEG<sub>k</sub>) (1 mM) (PS standard, eluent, THF; flow rate, 0.6 mL/min, detected by UV).

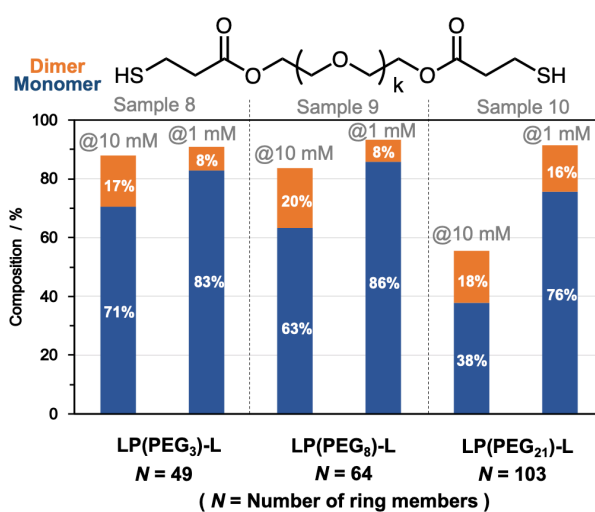

**Figure S12.** Productivities of macrocyclic monomers and dimers at samples 1 to 12 at 1 mM and 10 mM.

## 4. Estimation for enthalpy of ring–chain equilibria

### Oligomerization behavior

In a test tube, **MM(C<sub>5</sub>)-S** (in toluene, 10.0 mM of BiTEMPS unit concentration) was added and stirred at 80, 90, or 100 °C for 18 days. The reaction was tracked by gel permeation chromatography (GPC). The ratio of monomer and dimer was calculated from area ratio of peaks. The upper-side of the test tube was kept under 10 °C to prevent the solvent removing outside during this experiment.

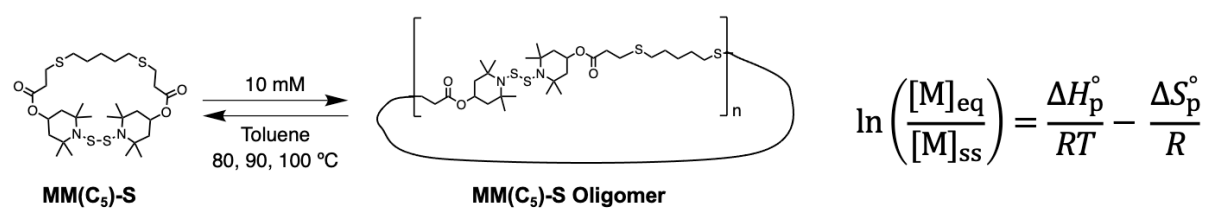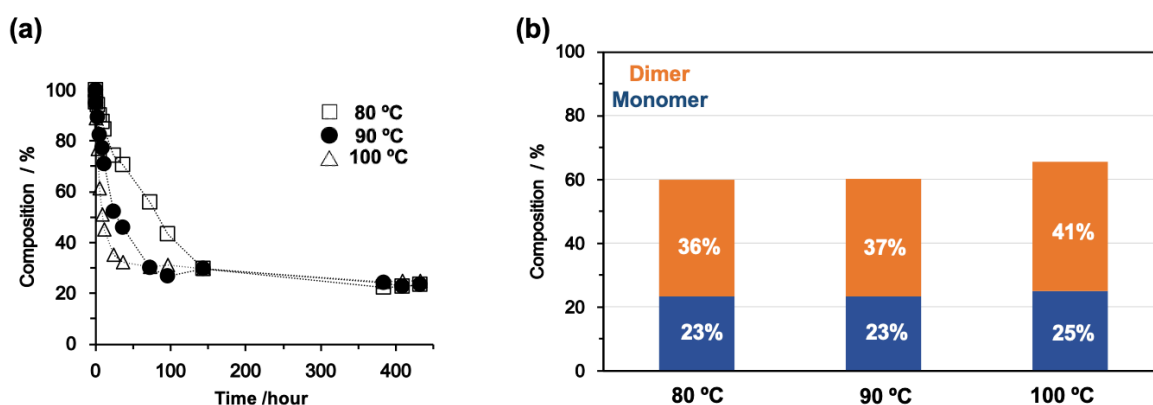

**Figure S13.** (a) Changes in composition ratio of macrocyclic monomer during oligomerization reactions of **MM(C<sub>5</sub>)-S** at 10 mM. (a) Productivities of cyclic monomers and dimers after 18 days.

## DFT calculation

The calculations of  $\Delta H$  were conducted by using DFT at the UB3LYP/6-31G(d,p) level. **L(C<sub>x</sub>)-S** was adducts of **MM(C<sub>x</sub>)-S** and **BiTEMPS-OMe** (BiTEMPS derivative with simple structure) and used as linear counterparts  $\Delta H$  value was estimated from the equation below.

$$\Delta H = H(\text{Cyclic}) + H(\text{End}) - H(\text{Linear})$$

As typical strained cyclic monomers, we calculated  $\Delta H$  of  $\delta$ -valerolactone,  $\epsilon$ -caprolactone, 1,2-dithiolane, cyclopentene, and cyclooctene. The calculated  $\Delta H$  values of cyclopentene, and cyclooctene were referred to the article Wang reported<sup>[1]</sup> (Calculations level was B3LYP/6-31G(d,p)). Optimized geometries from DFT calculations at UB3LYP/6-31g(d,p) level was summarized at the end the document.

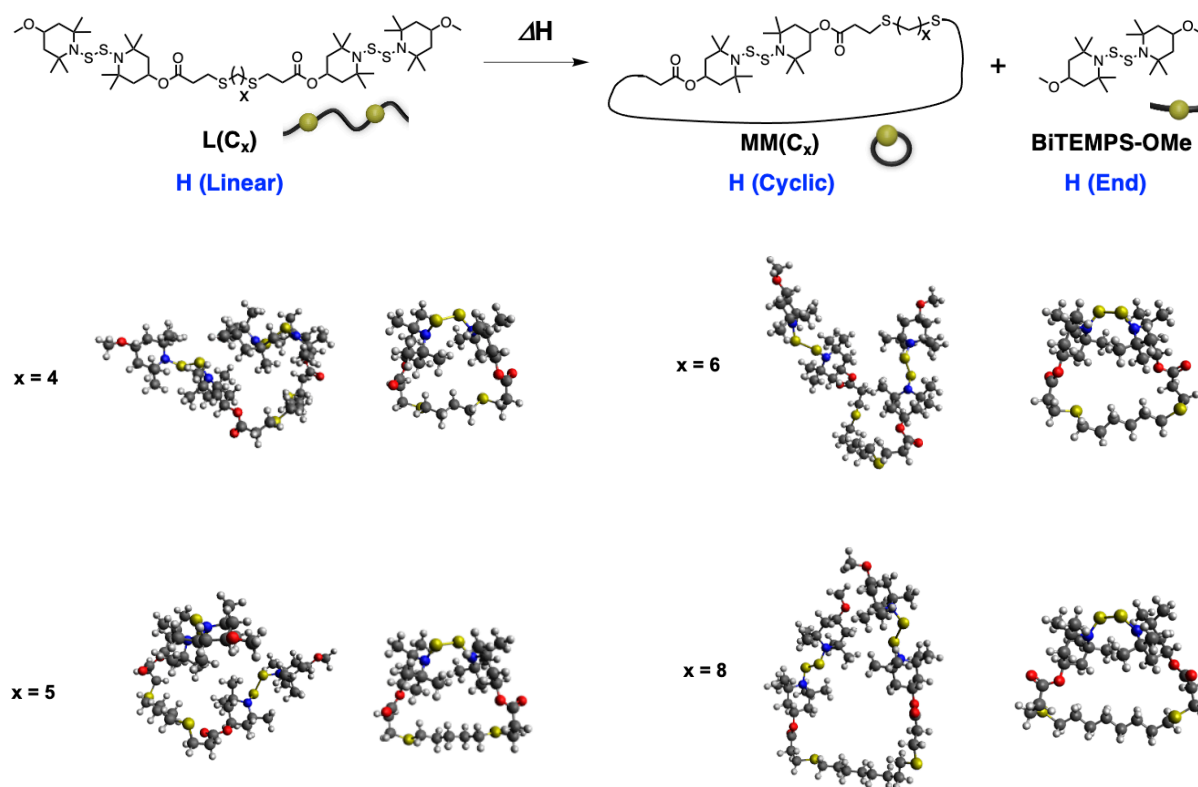

**Figure S14.** Schematic image of calculations of  $\Delta H$  and optimized structures of **MM(C<sub>x</sub>)-S** and its linear counterparts **L(C<sub>x</sub>)-S**.

## 5. Characterization of isolated macrocycles

### Spectra

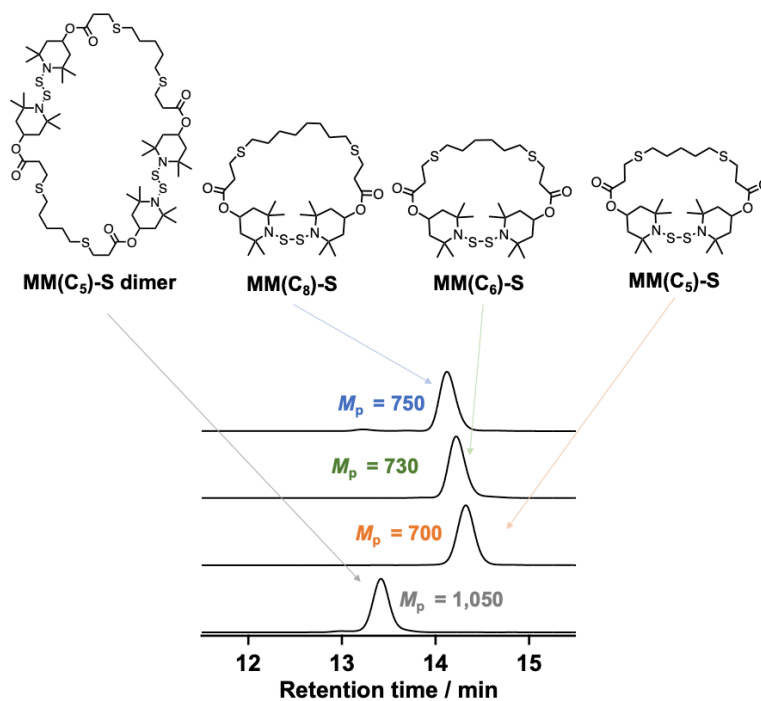

**Figure S15.** (a) GPC profiles of MM(C<sub>5</sub>)-S dimer, MM(C<sub>8</sub>)-S, MM(C<sub>6</sub>)-S, and MM(C<sub>5</sub>)-S (PS standard, eluent, THF; flow rate, 0.6 mL/min, detected by RI).

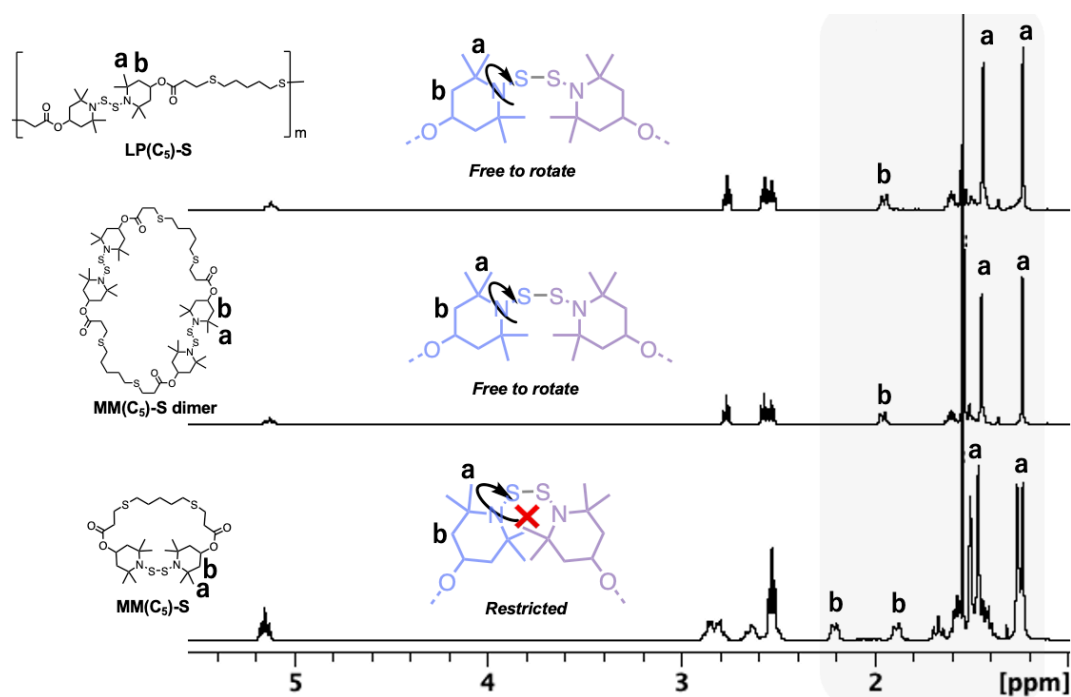

**Figure S16.** <sup>1</sup>H NMR spectra of MM(C<sub>5</sub>)-S dimer, MM(C<sub>8</sub>)-S, MM(C<sub>6</sub>)-S, and MM(C<sub>5</sub>)-S (500 MHz, 25 °C, CDCl<sub>3</sub>).

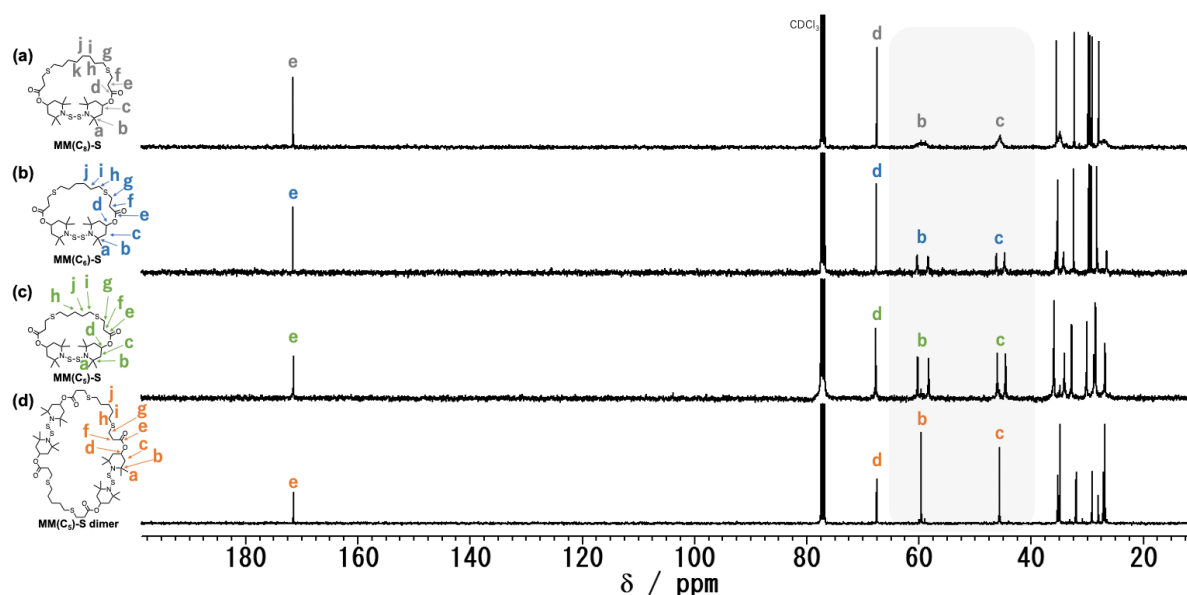

**Figure S17.**  $^{13}\text{C}\{^1\text{H}\}$  NMR spectra of **MM(C<sub>5</sub>)-S dimer**, **MM(C<sub>8</sub>)-S**, **MM(C<sub>6</sub>)-S**, and **MM(C<sub>5</sub>)-S** (100 MHz, 25 °C,  $\text{CDCl}_3$ ).

### X-ray crystallography

Single crystals of **MM(C<sub>5</sub>)-S** and **MM(C<sub>8</sub>)-S** were obtained by vapor diffusion of heptane into ethyl acetate solutions and mounted on a fiber loop. Diffraction experiments were performed on a Rigaku Saturn CCD area detector with graphite monochromated Mo-K $\alpha$  radiation ( $\lambda = 0.710\ 73\ \text{\AA}$ ). Intensity data ( $6^\circ < 2\theta < 55^\circ$ ) were corrected for Lorentz–polarization effects and for absorption. Structure solution and refinements were carried out by using the CrystalStructure program package.<sup>2</sup> The structures were solved by SHELXT<sup>3</sup> and refined by full-matrix least-squares techniques against  $F^2$  using the SHELXL-2014/7 program.<sup>4</sup> The crystals of **MM(C<sub>5</sub>)-S** and **MM(C<sub>8</sub>)-S** contain nine and two crystallographically independent molecules (Figures S18 and S19). Some of the carbon atoms were partially disordered and refined with restraint geometries and thermal displacement parameters. The CH hydrogen atoms were included in the refinements with a riding model.

CCDC-2261420 and CCDC-2261421 contain the supplementary crystallographic data for this paper. These data can be obtained free of charge from The Cambridge Crystallographic Data Centre via [http://www.ccdc.cam.ac.uk/data\\_request/cif](http://www.ccdc.cam.ac.uk/data_request/cif).

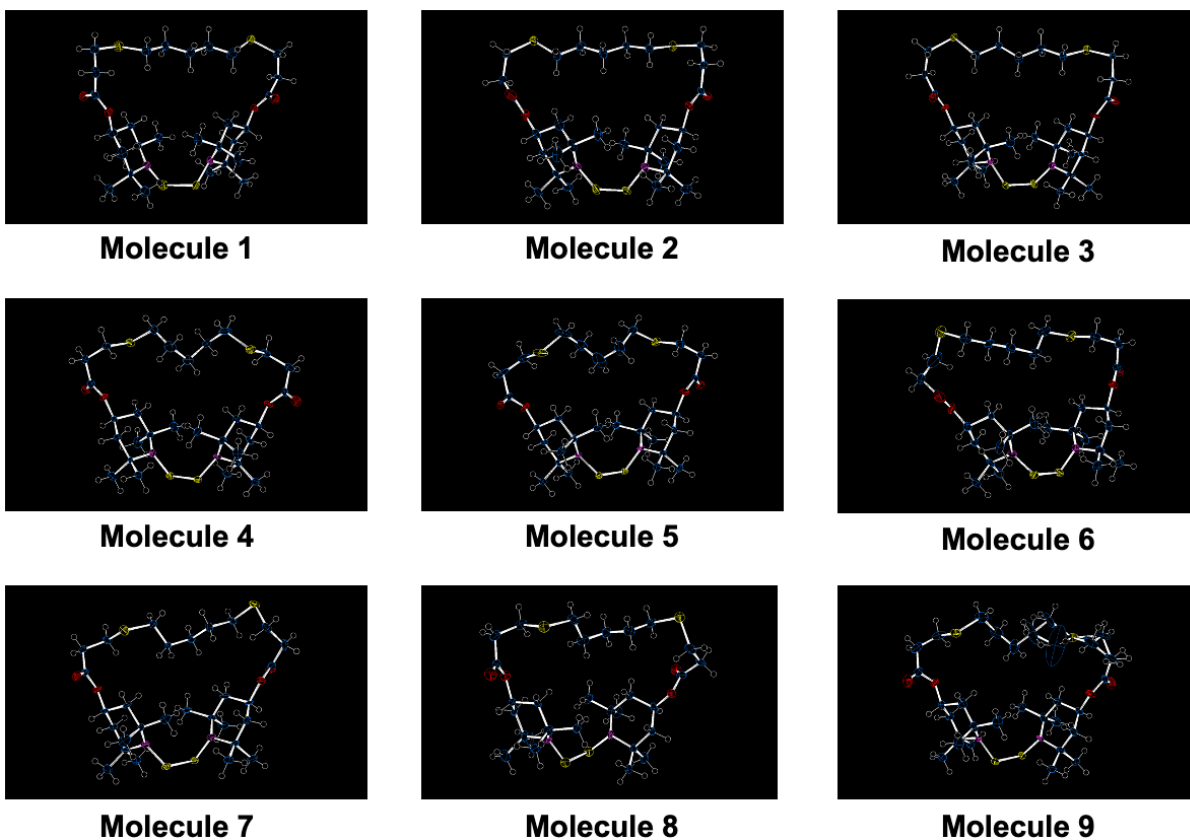

**Figure S18.** X-ray structures of MM(C<sub>5</sub>)-S.

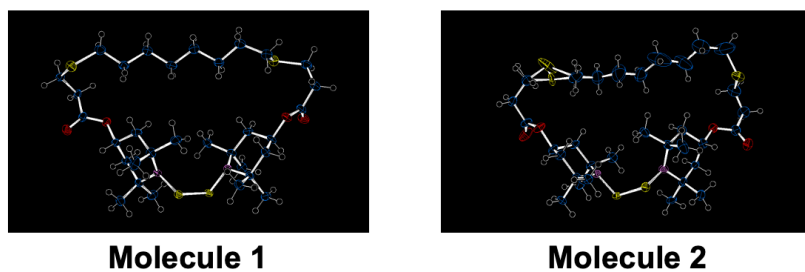

**Figure S19.** X-ray structures of MM(C<sub>8</sub>)-S.



## 6. Polymerization of isolated macrocycles

We conducted polymerization of isolated macrocycles shown in **Figure 4** in a concentrated solution in order to investigate their polymerization behavior. Polymerization was conducted in 1,4-dioxane (256 mM BiTEMPS unit concentration). The polymerization was performed at 80 °C to ensure that early polymerization behavior could be observed. **Figure S21** shows the monomer ( $m = 1$ ) ratio, dimer ( $m = 2$ ) ratio, and  $M_p$  of the polymer during the polymerization, respectively. These results indicate that the polymerization of MMs with a smaller ring occurred more rapidly. This result suggests that the polymerization behavior of MMs can be controlled by changing the chain length of MMs.

(Experimental detail)

In a 20 mL test tube, **MM(R)-S or L** (in 1,4-dioxane, 256 mM of BiTEMPS unit concentration) and stirred at 80 °C for 9 hours. The reactions were tracked by GPC measurements.

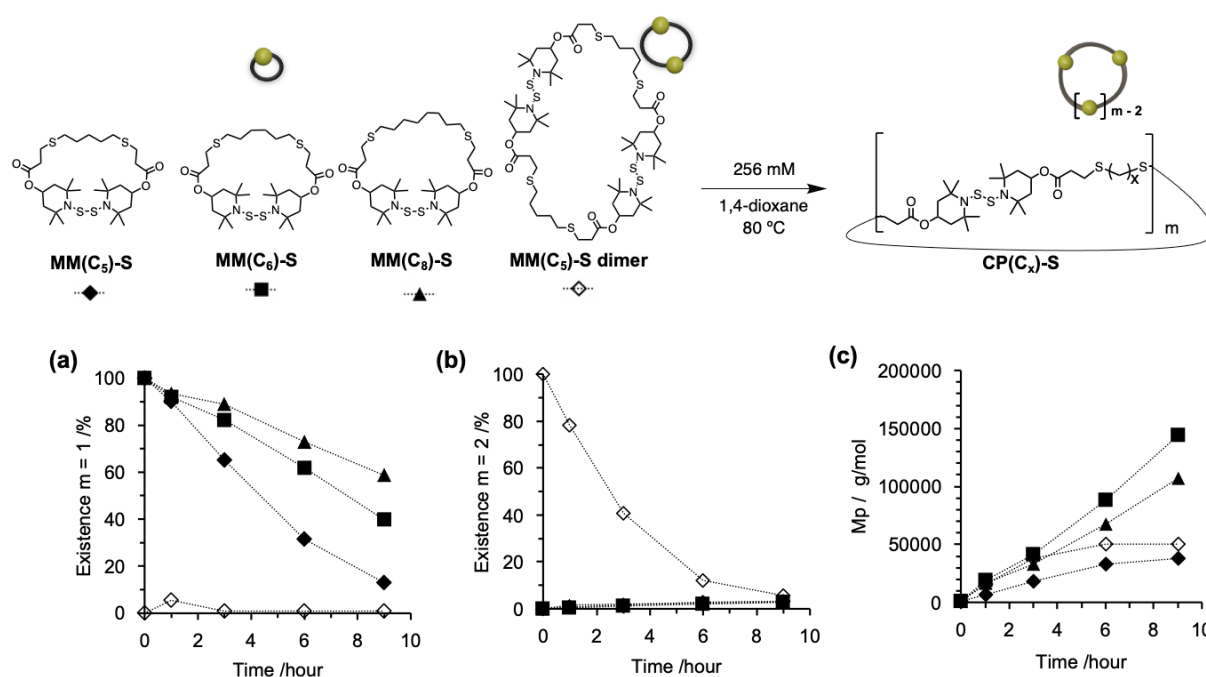

**Figure S20.** Polymerization behavior of MM(C<sub>5</sub>)-S, MM(C<sub>6</sub>)-S, MM(C<sub>8</sub>)-S, and MM(C<sub>5</sub>)-S dimer in 1,4-dioxane (256 mM) at 80°C. Composition ratio of (a) monomers ( $m = 1$ ) and (b) dimers ( $m = 2$ ). (c) Peak top molecular weight of polymers.

7.Optimized geometries from DFT calculations at UB3LYP/6-31g(d,p) level

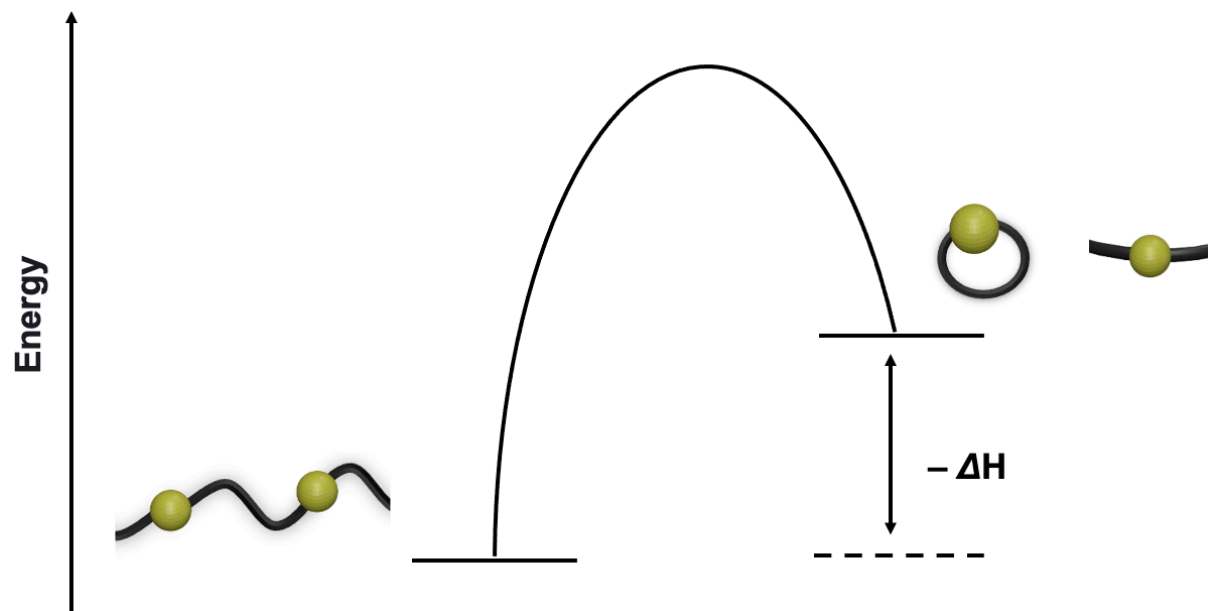

Figure S21. Ring-strain energy ( $\Delta H$ )

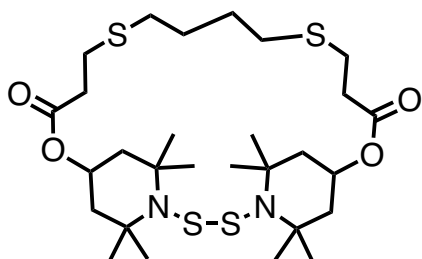

### MM(C<sub>4</sub>)-S

| atom | X        | Y        | Z        |
|------|----------|----------|----------|
| S    | -0.69246 | -3.95777 | 0.69506  |
| S    | 4.54571  | 3.42211  | -0.43046 |
| S    | -1.1019  | 4.77704  | -0.83181 |
| S    | -2.32574 | -3.37351 | -0.61868 |
| O    | 4.07161  | -0.84498 | -0.90313 |
| O    | 5.18881  | -0.23258 | 0.97256  |
| O    | -4.4276  | 3.36003  | -0.91895 |
| O    | -3.53792 | 2.19771  | 0.81566  |
| N    | 0.74304  | -3.1246  | 0.28586  |
| N    | -2.82765 | -1.78011 | -0.28445 |
| C    | 1.24948  | -2.16099 | 1.33056  |
| C    | 2.2234   | -1.17141 | 0.65447  |
| H    | 1.65457  | -0.51899 | -0.01901 |
| H    | 2.67815  | -0.54728 | 1.42788  |
| C    | 3.31153  | -1.84814 | -0.164   |
| H    | 4.01386  | -2.38101 | 0.48267  |
| C    | 2.68805  | -2.75171 | -1.21379 |
| H    | 3.47095  | -3.26525 | -1.78222 |
| H    | 2.14361  | -2.11293 | -1.91837 |
| C    | 1.70974  | -3.81017 | -0.64562 |
| C    | 0.08595  | -1.32282 | 1.89379  |
| H    | -0.51518 | -1.8932  | 2.60349  |
| H    | -0.57324 | -0.97105 | 1.0982   |
| H    | 0.49775  | -0.45699 | 2.42283  |

|   |          |          |          |
|---|----------|----------|----------|
| C | 1.92784  | -2.86539 | 2.53092  |
| H | 2.88105  | -3.33219 | 2.27925  |
| H | 1.26583  | -3.63584 | 2.93718  |
| H | 2.12353  | -2.13709 | 3.32501  |
| C | 0.9483   | -4.39177 | -1.85195 |
| H | 0.31109  | -3.63764 | -2.31752 |
| H | 0.32528  | -5.2409  | -1.56557 |
| H | 1.67321  | -4.7405  | -2.59457 |
| C | 2.47672  | -4.97322 | 0.02675  |
| H | 1.77251  | -5.65856 | 0.50755  |
| H | 3.19436  | -4.63971 | 0.77802  |
| H | 3.03204  | -5.53928 | -0.72872 |
| C | 4.96527  | -0.10603 | -0.21493 |
| C | 5.67916  | 0.88256  | -1.11964 |
| H | 5.1256   | 1.00516  | -2.05258 |
| H | 6.6444   | 0.41964  | -1.36966 |
| C | 5.94772  | 2.23371  | -0.44243 |
| H | 6.73285  | 2.76368  | -0.98816 |
| H | 6.30085  | 2.07502  | 0.58029  |
| C | 3.50537  | 2.79317  | 0.95676  |
| H | 3.09829  | 1.8128   | 0.6953   |
| H | 4.14769  | 2.66906  | 1.83345  |
| C | 2.35659  | 3.76008  | 1.26974  |
| H | 1.8673   | 3.39519  | 2.18324  |
| H | 2.76217  | 4.75094  | 1.50906  |
| C | 1.31037  | 3.87355  | 0.14997  |
| H | 1.76085  | 4.33442  | -0.73632 |
| H | 0.9923   | 2.86782  | -0.15219 |
| C | 0.07716  | 4.67666  | 0.57771  |
| H | 0.3597   | 5.68965  | 0.88565  |
| H | -0.41164 | 4.1859   | 1.42611  |
| C | -2.59358 | 5.50426  | -0.043   |
| H | -2.31809 | 6.42306  | 0.48325  |
| H | -3.23514 | 5.77663  | -0.88465 |

|   |          |          |          |
|---|----------|----------|----------|
| C | -3.36165 | 4.55931  | 0.89062  |
| H | -4.24432 | 5.08776  | 1.27454  |
| H | -2.76052 | 4.25776  | 1.75097  |
| C | -3.84585 | 3.32763  | 0.14454  |
| C | -3.7761  | 0.92953  | 0.13717  |
| H | -4.69625 | 1.02912  | -0.44333 |
| C | -2.58162 | 0.64148  | -0.76009 |
| H | -1.67726 | 0.75999  | -0.15234 |
| H | -2.53525 | 1.38427  | -1.56165 |
| C | -2.58374 | -0.77103 | -1.38232 |
| C | -3.95377 | -1.57724 | 0.69725  |
| C | -3.88932 | -0.12269 | 1.22605  |
| H | -3.01301 | -0.02595 | 1.87692  |
| H | -4.77388 | 0.06779  | 1.84374  |
| C | -1.19129 | -0.98296 | -2.00745 |
| H | -0.92498 | -0.0905  | -2.58287 |
| H | -1.1791  | -1.83662 | -2.68722 |
| H | -0.43092 | -1.14966 | -1.24167 |
| C | -3.6186  | -0.8655  | -2.52957 |
| H | -3.69497 | -1.89742 | -2.88518 |
| H | -3.29435 | -0.24275 | -3.36986 |
| H | -4.61533 | -0.5267  | -2.24394 |
| C | -3.76323 | -2.4957  | 1.91921  |
| H | -2.76262 | -2.39204 | 2.34248  |
| H | -3.92306 | -3.54524 | 1.66599  |
| H | -4.4942  | -2.21843 | 2.68556  |
| C | -5.34315 | -1.89265 | 0.09456  |
| H | -5.33498 | -2.88424 | -0.36767 |
| H | -5.66293 | -1.16906 | -0.65648 |
| H | -6.09966 | -1.8982  | 0.88658  |

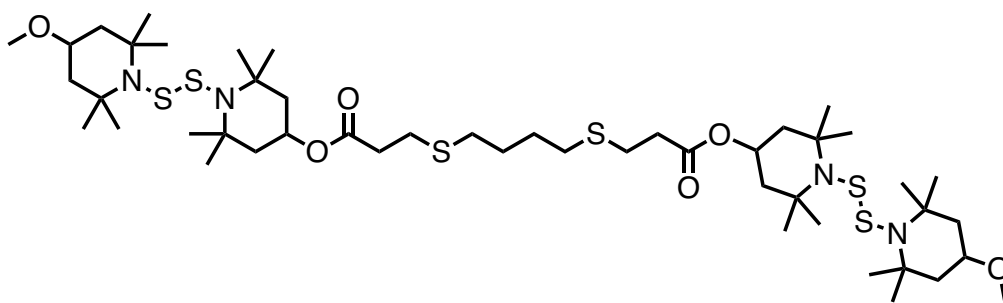

**L(C<sub>4</sub>)-S**

| atom | X        | Y        | Z        |
|------|----------|----------|----------|
| S    | -3.0362  | 5.01361  | 0.92771  |
| S    | -5.79011 | 2.30362  | -3.41579 |
| C    | 1.4835   | -2.84146 | 2.09674  |
| C    | 1.36745  | -2.2094  | 3.47233  |
| C    | 0.45432  | -0.99365 | 3.36526  |
| C    | -0.96465 | -1.30977 | 2.8385   |
| N    | -0.85488 | -2.12758 | 1.5756   |
| C    | 0.13461  | -3.26672 | 1.46983  |
| S    | -2.1548  | -2.12636 | 0.50009  |
| S    | -3.83648 | -3.60637 | 1.18492  |
| N    | -5.19686 | -3.10804 | 0.33871  |
| C    | -1.62368 | 0.04585  | 2.52     |
| C    | 0.42231  | -3.57349 | -0.01248 |
| C    | -0.3965  | -4.55872 | 2.13209  |
| O    | 2.68853  | -1.84414 | 3.87791  |
| C    | -5.41796 | -3.6444  | -1.05406 |
| C    | -6.90381 | -3.4604  | -1.43911 |
| C    | -7.46038 | -2.04518 | -1.30347 |
| C    | -6.7594  | -1.25134 | -0.19545 |
| C    | -6.15158 | -2.10879 | 0.93554  |
| C    | -4.49162 | -2.93822 | -2.06729 |
| C    | -5.42882 | -1.12791 | 1.87394  |
| C    | -7.23392 | -2.84228 | 1.76007  |
| O    | -7.27046 | -1.39019 | -2.59669 |
| C    | -1.80641 | -2.01204 | 3.9296   |
| C    | -5.13656 | -5.15892 | -1.09565 |

|   |          |          |          |
|---|----------|----------|----------|
| C | -7.90718 | -0.2211  | -2.79284 |
| O | -8.61357 | 0.31819  | -1.96255 |
| C | -7.65921 | 0.32626  | -4.18652 |
| C | -7.40362 | 1.83682  | -4.17899 |
| C | -2.05583 | 5.12742  | 2.47853  |
| C | -0.8548  | 6.06449  | 2.29519  |
| C | 0.20847  | 5.53402  | 1.34813  |
| O | 0.68342  | 4.34211  | 1.78168  |
| O | 0.60238  | 6.10943  | 0.35789  |
| C | 1.70187  | 3.69407  | 0.96696  |
| C | 2.60016  | 2.91705  | 1.90958  |
| C | 3.7031   | 2.11541  | 1.17434  |
| N | 3.06362  | 1.28837  | 0.09051  |
| C | 2.03438  | 1.89373  | -0.83602 |
| C | 1.03572  | 2.73627  | -0.0042  |
| S | 3.80882  | -0.15608 | -0.41141 |
| C | 1.20066  | 0.78304  | -1.5051  |
| C | 2.66803  | 2.75473  | -1.95332 |
| C | 4.34491  | 1.18969  | 2.22586  |
| C | 4.7871   | 3.07787  | 0.63721  |
| S | 5.21351  | -0.00523 | -2.16882 |
| N | 6.81065  | -0.52266 | -1.90613 |
| C | 7.8554   | 0.47377  | -1.48058 |
| C | 9.24783  | -0.01973 | -1.94461 |
| C | 9.55619  | -1.46471 | -1.56494 |
| C | 8.4807   | -2.35478 | -2.16248 |
| C | 7.03862  | -2.00423 | -1.72479 |
| C | 6.10122  | -2.80408 | -2.65145 |
| C | 6.78206  | -2.46961 | -0.27241 |
| C | 7.60928  | 1.81509  | -2.19737 |
| C | 7.8589   | 0.72056  | 0.04512  |
| O | 10.80201 | -1.90723 | -2.10259 |
| C | 11.94087 | -1.45657 | -1.39824 |
| C | 2.83922  | -1.63601 | 5.26812  |

|   |          |          |          |
|---|----------|----------|----------|
| C | -4.32693 | 3.82822  | 1.49381  |
| C | -5.48633 | 3.72572  | 0.49632  |
| C | -5.10115 | 3.14195  | -0.8711  |
| C | -6.32285 | 2.95847  | -1.77512 |
| H | 2.1366   | -3.71875 | 2.14637  |
| H | 1.9731   | -2.11452 | 1.43833  |
| H | 0.96579  | -2.93402 | 4.19825  |
| H | 0.9378   | -0.28421 | 2.68313  |
| H | 0.34679  | -0.49432 | 4.33466  |
| H | -1.14349 | 0.51663  | 1.65809  |
| H | -2.68795 | -0.05425 | 2.30744  |
| H | -1.50921 | 0.70671  | 3.38577  |
| H | 0.69447  | -2.66307 | -0.55277 |
| H | 1.26509  | -4.27015 | -0.06853 |
| H | -0.43245 | -4.03019 | -0.51243 |
| H | 0.30384  | -5.38136 | 1.95164  |
| H | -0.5232  | -4.4645  | 3.21231  |
| H | -1.35984 | -4.84377 | 1.69938  |
| H | -7.03772 | -3.79202 | -2.47312 |
| H | -7.50728 | -4.13129 | -0.82027 |
| H | -8.53919 | -2.07892 | -1.12691 |
| H | -5.94763 | -0.67632 | -0.65229 |
| H | -7.45549 | -0.52827 | 0.23506  |
| H | -4.67432 | -1.86352 | -2.11711 |
| H | -3.44455 | -3.09857 | -1.79654 |
| H | -4.64659 | -3.34875 | -3.07107 |
| H | -4.60957 | -0.62543 | 1.3554   |
| H | -6.14411 | -0.37205 | 2.21392  |
| H | -5.02499 | -1.63197 | 2.75306  |
| H | -6.75604 | -3.42955 | 2.54988  |
| H | -7.91167 | -2.12255 | 2.23245  |
| H | -7.83642 | -3.5248  | 1.15682  |
| H | -1.31715 | -2.89904 | 4.3369   |
| H | -1.98228 | -1.3221  | 4.76249  |



|   |          |          |          |
|---|----------|----------|----------|
| H | -2.77552 | -2.31594 | 3.52766  |
| H | -4.083   | -5.37703 | -0.91808 |
| H | -5.72703 | -5.68521 | -0.33933 |
| H | -5.40625 | -5.55243 | -2.08136 |
| H | -6.83216 | -0.21304 | -4.65256 |
| H | -8.56389 | 0.11855  | -4.77578 |
| H | -7.38827 | 2.21208  | -5.20516 |
| H | -8.20436 | 2.3528   | -3.64408 |
| H | -2.70031 | 5.51268  | 3.27531  |
| H | -1.70707 | 4.13109  | 2.76362  |
| H | -1.16935 | 7.04069  | 1.92002  |
| H | -0.3847  | 6.21036  | 3.27535  |
| H | 2.24161  | 4.48201  | 0.43842  |
| H | 1.97837  | 2.22331  | 2.48748  |
| H | 3.08117  | 3.59606  | 2.62212  |
| H | 0.39775  | 2.06026  | 0.57702  |
| H | 0.38872  | 3.28889  | -0.69211 |
| H | 0.82528  | 0.07294  | -0.76333 |
| H | 0.34311  | 1.24551  | -2.00417 |
| H | 1.76873  | 0.22953  | -2.25378 |
| H | 1.89327  | 3.06018  | -2.66433 |
| H | 3.14112  | 3.66368  | -1.57764 |
| H | 3.42223  | 2.18194  | -2.49873 |
| H | 3.64758  | 0.41966  | 2.56666  |
| H | 5.23453  | 0.68738  | 1.84461  |
| H | 4.6439   | 1.79468  | 3.08852  |
| H | 5.48002  | 2.5436   | -0.01348 |
| H | 4.37314  | 3.91317  | 0.06993  |
| H | 5.3598   | 3.49849  | 1.47087  |
| H | 9.30996  | 0.05084  | -3.03699 |
| H | 9.99689  | 0.66528  | -1.53192 |
| H | 9.58554  | -1.57874 | -0.46945 |
| H | 8.55492  | -2.27267 | -3.25332 |
| H | 8.68085  | -3.39972 | -1.90405 |

|   |          |          |          |
|---|----------|----------|----------|
| H | 6.15095  | -2.42813 | -3.67668 |
| H | 6.42264  | -3.8508  | -2.65022 |
| H | 5.06112  | -2.76863 | -2.32517 |
| H | 7.50389  | -2.06448 | 0.43922  |
| H | 5.78351  | -2.17192 | 0.0574   |
| H | 6.84492  | -3.562   | -0.21924 |
| H | 7.51438  | 1.66425  | -3.27617 |
| H | 6.70769  | 2.31775  | -1.84609 |
| H | 8.46162  | 2.47723  | -2.01406 |
| H | 6.84774  | 0.92295  | 0.39927  |
| H | 8.24705  | -0.12839 | 0.6109   |
| H | 8.48311  | 1.58867  | 0.28367  |
| H | 12.07205 | -0.36584 | -1.45007 |
| H | 11.90561 | -1.74832 | -0.33658 |
| H | 12.80987 | -1.92944 | -1.86241 |
| H | 2.5593   | -2.53137 | 5.84479  |
| H | 3.89571  | -1.42082 | 5.445    |
| H | 2.24558  | -0.78826 | 5.64008  |
| H | -3.86629 | 2.84552  | 1.64711  |
| H | -4.70454 | 4.17977  | 2.4601   |
| H | -6.25622 | 3.08981  | 0.95394  |
| H | -5.93903 | 4.71628  | 0.36492  |
| H | -4.37179 | 3.79621  | -1.36299 |
| H | -4.60441 | 2.17388  | -0.72993 |
| H | -7.03441 | 2.25563  | -1.33389 |
| H | -6.83355 | 3.91537  | -1.92751 |

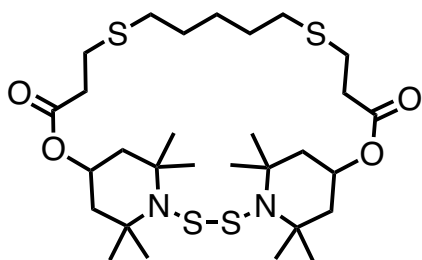

### MM(C<sub>5</sub>)-S

| atom | X        | Y        | Z        |
|------|----------|----------|----------|
| S    | -0.25422 | -4.01649 | -0.59812 |
| S    | -4.70101 | 4.26137  | 0.59701  |
| S    | 3.29231  | 4.54642  | 0.69566  |
| S    | 1.39877  | -3.80979 | 0.78234  |
| O    | -4.54067 | -0.08408 | 0.59519  |
| O    | -5.29616 | 0.65641  | -1.41079 |
| O    | 5.83538  | 1.86996  | 0.42336  |
| O    | 4.09139  | 1.14708  | -0.84613 |
| N    | -1.48886 | -2.87868 | -0.25032 |
| N    | 2.32277  | -2.42958 | 0.40502  |
| C    | -1.74042 | -1.86292 | -1.33925 |
| C    | -2.58127 | -0.70738 | -0.74978 |
| H    | -1.9705  | -0.15785 | -0.02281 |
| H    | -2.84917 | -0.02208 | -1.55739 |
| C    | -3.83705 | -1.19085 | -0.04303 |
| H    | -4.53098 | -1.64402 | -0.75628 |
| C    | -3.45819 | -2.1411  | 1.07861  |
| H    | -4.35778 | -2.50394 | 1.58704  |
| H    | -2.87906 | -1.57106 | 1.81415  |
| C    | -2.62249 | -3.36089 | 0.62002  |
| C    | -0.40813 | -1.25083 | -1.8113  |
| H    | 0.15283  | -1.94193 | -2.44213 |
| H    | 0.22503  | -0.97626 | -0.96637 |
| H    | -0.61955 | -0.35292 | -2.40115 |
| C    | -2.43549 | -2.46405 | -2.58518 |
| H    | -3.46242 | -2.78095 | -2.39847 |

|   |          |          |          |
|---|----------|----------|----------|
| H | -1.87266 | -3.32887 | -2.94864 |
| H | -2.46586 | -1.72053 | -3.3885  |
| C | -2.05077 | -4.00273 | 1.89868  |
| H | -1.33465 | -3.33666 | 2.38466  |
| H | -1.55294 | -4.95092 | 1.68788  |
| H | -2.87071 | -4.2011  | 2.59661  |
| C | -3.51843 | -4.4119  | -0.0766  |
| H | -2.90518 | -5.22685 | -0.47175 |
| H | -4.10603 | -3.99863 | -0.89833 |
| H | -4.2203  | -4.84152 | 0.64611  |
| C | -5.25926 | 0.737    | -0.19949 |
| C | -6.05511 | 1.74213  | 0.6127   |
| H | -5.7189  | 1.74652  | 1.65112  |
| H | -7.08775 | 1.36675  | 0.60299  |
| C | -6.04372 | 3.15631  | 0.00967  |
| H | -6.95202 | 3.68901  | 0.30351  |
| H | -6.03627 | 3.09637  | -1.08223 |
| C | -3.20501 | 3.60602  | -0.25273 |
| H | -3.12406 | 2.52953  | -0.07527 |
| H | -3.30282 | 3.76936  | -1.33127 |
| C | -1.96932 | 4.31866  | 0.30694  |
| H | -1.87159 | 4.06821  | 1.37058  |
| H | -2.11711 | 5.40508  | 0.25891  |
| C | -0.6697  | 3.95457  | -0.4276  |
| H | -0.59508 | 2.86334  | -0.53254 |
| H | -0.69765 | 4.36084  | -1.44777 |
| C | 0.57073  | 4.47369  | 0.31491  |
| H | 0.4627   | 5.54504  | 0.52286  |
| H | 0.62568  | 3.97595  | 1.29192  |
| C | 1.88089  | 4.23973  | -0.44641 |
| H | 1.95196  | 4.91393  | -1.30736 |
| H | 1.93483  | 3.20898  | -0.81119 |
| C | 4.73939  | 4.56151  | -0.43522 |
| H | 4.69493  | 5.44718  | -1.07647 |

|   |         |          |          |
|---|---------|----------|----------|
| H | 5.59407 | 4.6728   | 0.23729  |
| C | 4.9265  | 3.30751  | -1.29896 |
| H | 5.86661 | 3.411    | -1.85533 |
| H | 4.12069 | 3.20269  | -2.02802 |
| C | 5.0269  | 2.04493  | -0.46134 |
| C | 3.9731  | -0.10096 | -0.10526 |
| H | 4.87268 | -0.21191 | 0.50338  |
| C | 2.72016 | -0.0062  | 0.7523   |
| H | 1.89647 | 0.31165  | 0.10243  |
| H | 2.85244 | 0.7686   | 1.51489  |
| C | 2.3268  | -1.33198 | 1.44209  |
| C | 3.48943 | -2.59386 | -0.53505 |
| C | 3.83085 | -1.2088  | -1.13503 |
| H | 3.03078 | -0.92117 | -1.82673 |
| H | 4.75192 | -1.29509 | -1.72195 |
| C | 0.91269 | -1.13535 | 2.02372  |
| H | 0.88018 | -0.17614 | 2.55069  |
| H | 0.65815 | -1.91914 | 2.73922  |
| H | 0.15063 | -1.13492 | 1.24178  |
| C | 3.27042 | -1.6301  | 2.6327   |
| H | 3.06143 | -2.62371 | 3.04023  |
| H | 3.10197 | -0.8977  | 3.42927  |
| H | 4.32803 | -1.58339 | 2.37007  |
| C | 3.09554 | -3.49583 | -1.72046 |
| H | 2.17126 | -3.15453 | -2.19047 |
| H | 2.963   | -4.535   | -1.4142  |
| H | 3.89589 | -3.46425 | -2.4667  |
| C | 4.72539 | -3.23281 | 0.14098  |
| H | 4.43783 | -4.15672 | 0.65156  |
| H | 5.2084  | -2.57757 | 0.86711  |
| H | 5.47368 | -3.48779 | -0.61701 |

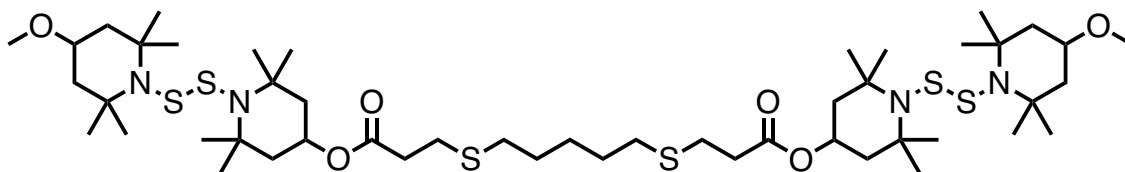

### L(C<sub>5</sub>)-S

| atom | X        | Y        | Z        |
|------|----------|----------|----------|
| S    | -4.34345 | -7.00441 | -2.00285 |
| S    | -2.87227 | -1.89475 | 4.30999  |
| C    | 8.77873  | 1.35271  | -2.5271  |
| C    | 9.206    | 2.20873  | -1.33793 |
| C    | 7.96195  | 2.663    | -0.59195 |
| C    | 7.07549  | 1.50034  | -0.09001 |
| N    | 6.78105  | 0.58495  | -1.25231 |
| C    | 7.89271  | 0.13259  | -2.16841 |
| S    | 5.29483  | -0.21204 | -1.35206 |
| S    | 5.14188  | -2.23403 | -0.48367 |
| N    | 4.04201  | -2.20415 | 0.85307  |
| C    | 5.7665   | 2.11999  | 0.43113  |
| C    | 7.31719  | -0.38589 | -3.50143 |
| C    | 8.73425  | -1.00676 | -1.54762 |
| O    | 9.89257  | 3.38973  | -1.75001 |
| C    | 2.59965  | -2.4387  | 0.45736  |
| C    | 1.6937   | -2.22004 | 1.69199  |
| C    | 2.15308  | -2.99151 | 2.91607  |
| C    | 3.56042  | -2.5605  | 3.27461  |
| C    | 4.58085  | -2.79157 | 2.13437  |
| C    | 2.18131  | -1.37635 | -0.57735 |
| C    | 5.8567   | -2.03982 | 2.54172  |
| C    | 4.92679  | -4.29622 | 2.01865  |
| O    | 1.31024  | -2.66119 | 4.05826  |
| C    | 7.7622   | 0.77566  | 1.08889  |
| C    | 2.34465  | -3.83462 | -0.1581  |
| C    | 0.17498  | -3.37094 | 4.20963  |

|   |          |          |          |
|---|----------|----------|----------|
| O | -0.1824  | -4.25817 | 3.46113  |
| C | -0.56392 | -2.95857 | 5.47106  |
| C | -2.07154 | -3.18208 | 5.36303  |
| C | -3.91117 | -5.70574 | -3.22579 |
| C | -5.08286 | -4.87514 | -3.80863 |
| C | -5.31385 | -3.56871 | -3.07247 |
| O | -4.52691 | -2.59405 | -3.58191 |
| O | -6.08019 | -3.40373 | -2.1441  |
| C | -4.61763 | -1.26973 | -2.98171 |
| C | -3.58829 | -1.13431 | -1.87348 |
| C | -3.53477 | 0.28562  | -1.25536 |
| N | -3.42761 | 1.30172  | -2.36141 |
| C | -4.29637 | 1.19857  | -3.59064 |
| C | -4.3082  | -0.27131 | -4.07917 |
| S | -2.69412 | 2.80579  | -2.05132 |
| C | -3.69281 | 2.02662  | -4.74258 |
| C | -5.73889 | 1.70048  | -3.34742 |
| C | -2.26072 | 0.3307   | -0.39072 |
| C | -4.76311 | 0.51334  | -0.34566 |
| S | -4.07553 | 4.47516  | -1.42006 |
| N | -3.72938 | 5.21356  | 0.06904  |
| C | -4.39268 | 4.70802  | 1.32412  |
| C | -4.47431 | 5.85748  | 2.35589  |
| C | -3.16131 | 6.58478  | 2.58704  |
| C | -2.68034 | 7.14103  | 1.2509   |
| C | -2.49153 | 6.07472  | 0.14351  |
| C | -2.30266 | 6.85045  | -1.17556 |
| C | -1.20929 | 5.24792  | 0.39718  |
| C | -5.84622 | 4.3053   | 1.01074  |
| C | -3.66128 | 3.49274  | 1.93661  |
| O | -3.42532 | 7.61826  | 3.53507  |
| C | -2.27477 | 8.16134  | 4.14999  |
| C | 11.23925 | 3.18799  | -2.12831 |
| C | -4.96223 | -6.05937 | -0.55084 |

|   |          |          |          |
|---|----------|----------|----------|
| C | -3.90295 | -5.25268 | 0.20235  |
| C | -4.49764 | -4.50164 | 1.40288  |
| C | -3.45382 | -3.67318 | 2.16593  |
| C | -4.06569 | -2.90678 | 3.34101  |
| H | 9.6512   | 0.98051  | -3.07526 |
| H | 8.22202  | 2.00584  | -3.20962 |
| H | 9.86618  | 1.63414  | -0.6687  |
| H | 7.37833  | 3.29807  | -1.26872 |
| H | 8.25221  | 3.28136  | 0.26411  |
| H | 5.1957   | 2.57829  | -0.38094 |
| H | 5.12891  | 1.382    | 0.92156  |
| H | 6.0145   | 2.89802  | 1.16007  |
| H | 6.61191  | 0.32915  | -3.93242 |
| H | 8.14574  | -0.52083 | -4.20446 |
| H | 6.8076   | -1.34434 | -3.39286 |
| H | 9.32926  | -0.68416 | -0.69188 |
| H | 8.08382  | -1.82229 | -1.21917 |
| H | 9.4254   | -1.40642 | -2.29765 |
| H | 1.68515  | -1.15423 | 1.94867  |
| H | 0.67195  | -2.50729 | 1.42786  |
| H | 2.07689  | -4.06904 | 2.75554  |
| H | 3.53533  | -1.49286 | 3.52191  |
| H | 3.90828  | -3.09355 | 4.16601  |
| H | 2.43568  | -0.37267 | -0.22823 |
| H | 2.65875  | -1.54034 | -1.5459  |
| H | 1.09787  | -1.42816 | -0.72845 |
| H | 5.66413  | -0.96566 | 2.59212  |
| H | 6.1809   | -2.37833 | 3.53117  |
| H | 6.67148  | -2.2218  | 1.83907  |
| H | 5.62158  | -4.46377 | 1.19074  |
| H | 5.41227  | -4.64152 | 2.93789  |
| H | 4.04897  | -4.92342 | 1.85387  |
| H | 8.79725  | 0.50091  | 0.88028  |
| H | 7.77083  | 1.42864  | 1.96836  |



|   |          |          |          |
|---|----------|----------|----------|
| H | 7.21692  | -0.13107 | 1.34454  |
| H | 3.03559  | -4.0148  | -0.98575 |
| H | 2.45343  | -4.64696 | 0.56303  |
| H | 1.32461  | -3.88552 | -0.55283 |
| H | -0.16431 | -3.57735 | 6.28699  |
| H | -0.3165  | -1.92265 | 5.71772  |
| H | -2.25689 | -4.15955 | 4.91324  |
| H | -2.52797 | -3.15992 | 6.35592  |
| H | -3.13087 | -5.04941 | -2.82939 |
| H | -3.45075 | -6.2825  | -4.03257 |
| H | -4.85451 | -4.63326 | -4.85098 |
| H | -6.00708 | -5.45584 | -3.77721 |
| H | -5.63245 | -1.15844 | -2.59512 |
| H | -2.60535 | -1.38113 | -2.29194 |
| H | -3.8005  | -1.84936 | -1.0721  |
| H | -3.32438 | -0.51603 | -4.49637 |
| H | -5.03815 | -0.36273 | -4.89023 |
| H | -2.63209 | 1.79832  | -4.87495 |
| H | -4.22116 | 1.77276  | -5.66749 |
| H | -3.79271 | 3.10023  | -4.57989 |
| H | -6.28868 | 1.71649  | -4.29479 |
| H | -6.29937 | 1.07217  | -2.65279 |
| H | -5.72804 | 2.71678  | -2.94587 |
| H | -1.36675 | 0.25954  | -1.01679 |
| H | -2.18858 | 1.24568  | 0.1973   |
| H | -2.26931 | -0.51623 | 0.30288  |
| H | -5.70596 | 0.25414  | -0.83058 |
| H | -4.67981 | -0.10188 | 0.55654  |
| H | -4.81937 | 1.55803  | -0.03891 |
| H | -5.20635 | 6.59892  | 2.01468  |
| H | -4.84416 | 5.45102  | 3.30311  |
| H | -2.41001 | 5.90034  | 3.01234  |
| H | -3.42339 | 7.87555  | 0.91816  |
| H | -1.72909 | 7.672    | 1.36536  |

|   |          |          |          |
|---|----------|----------|----------|
| H | -3.22663 | 7.35657  | -1.46719 |
| H | -1.52556 | 7.60717  | -1.02554 |
| H | -1.99201 | 6.2059   | -1.99876 |
| H | -1.19344 | 4.77594  | 1.38123  |
| H | -1.10447 | 4.4606   | -0.35362 |
| H | -0.33088 | 5.89906  | 0.32859  |
| H | -6.36794 | 5.11501  | 0.4932   |
| H | -5.90861 | 3.41119  | 0.38987  |
| H | -6.36802 | 4.10319  | 1.95149  |
| H | -4.27932 | 3.03717  | 2.71753  |
| H | -3.47    | 2.73809  | 1.17314  |
| H | -2.70481 | 3.75847  | 2.39052  |
| H | -1.67548 | 7.3848   | 4.65116  |
| H | -1.62318 | 8.69446  | 3.44244  |
| H | -2.62239 | 8.87458  | 4.90139  |
| H | 11.82215 | 2.71397  | -1.32278 |
| H | 11.34137 | 2.57268  | -3.03397 |
| H | 11.663   | 4.17413  | -2.33334 |
| H | -5.78705 | -5.41863 | -0.87163 |
| H | -5.38089 | -6.8377  | 0.09672  |
| H | -3.0993  | -5.92047 | 0.53485  |
| H | -3.43923 | -4.52572 | -0.47696 |
| H | -5.30592 | -3.8461  | 1.0506   |
| H | -4.96443 | -5.2235  | 2.08821  |
| H | -2.64543 | -4.32139 | 2.52291  |
| H | -2.98241 | -2.95311 | 1.48481  |
| H | -4.81185 | -2.18743 | 2.98627  |
| H | -4.58469 | -3.58086 | 4.03133  |

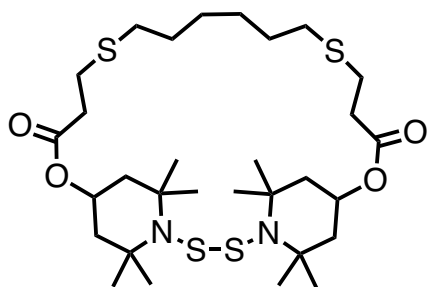

### MM(C<sub>6</sub>)-S

| atom | X        | Y        | Z        |
|------|----------|----------|----------|
| S    | -0.89141 | -4.05891 | -0.86657 |
| S    | 6.19543  | 1.68934  | -0.8232  |
| S    | -1.65867 | 4.97611  | 0.79543  |
| S    | -2.54835 | -3.57619 | 0.45387  |
| O    | 3.69947  | -0.79601 | 0.8748   |
| O    | 5.737    | -1.73647 | 0.52313  |
| O    | -4.7462  | 2.98013  | 1.28837  |
| O    | -4.06976 | 2.02002  | -0.65057 |
| N    | 0.51397  | -3.20736 | -0.40388 |
| N    | -3.08785 | -1.97908 | 0.18444  |
| C    | 1.47967  | -3.89568 | 0.52827  |
| C    | 2.40046  | -2.82366 | 1.16378  |
| H    | 1.81261  | -2.23012 | 1.87341  |
| H    | 3.18854  | -3.33014 | 1.73135  |
| C    | 3.0198   | -1.8666  | 0.15764  |
| H    | 3.76402  | -2.36772 | -0.46415 |
| C    | 1.93813  | -1.19549 | -0.66882 |
| H    | 2.39706  | -0.52776 | -1.40562 |
| H    | 1.33428  | -0.57357 | 0.00217  |
| C    | 1.011    | -2.18894 | -1.40203 |
| C    | 0.71042  | -4.55589 | 1.68798  |
| H    | 0.0339   | -3.8475  | 2.16928  |
| H    | 1.43069  | -4.90876 | 2.43307  |
| H    | 0.12776  | -5.41501 | 1.35065  |
| C    | 2.30824  | -5.00035 | -0.16852 |

|   |          |          |          |
|---|----------|----------|----------|
| H | 3.03525  | -4.61035 | -0.88218 |
| H | 1.64369  | -5.68994 | -0.69762 |
| H | 2.86327  | -5.57658 | 0.5792   |
| C | -0.16687 | -1.36878 | -1.96259 |
| H | -0.85555 | -1.06718 | -1.17106 |
| H | -0.73259 | -1.93153 | -2.7068  |
| H | 0.22843  | -0.47114 | -2.44949 |
| C | 1.73914  | -2.82906 | -2.60908 |
| H | 1.92257  | -2.06865 | -3.3758  |
| H | 1.11592  | -3.61017 | -3.0544  |
| H | 2.70381  | -3.26794 | -2.35069 |
| C | 5.0458   | -0.83763 | 0.95271  |
| C | 5.59249  | 0.39527  | 1.65042  |
| H | 6.01763  | 0.06778  | 2.60866  |
| H | 4.78219  | 1.09349  | 1.86959  |
| C | 6.70289  | 1.05319  | 0.82422  |
| H | 7.47156  | 0.30925  | 0.5995   |
| H | 7.17226  | 1.86323  | 1.39019  |
| C | 5.19526  | 3.1812   | -0.39733 |
| H | 5.48168  | 3.50834  | 0.60836  |
| H | 5.53057  | 3.96189  | -1.08824 |
| C | 3.67625  | 3.00444  | -0.51564 |
| H | 3.32424  | 2.2727   | 0.22154  |
| H | 3.44613  | 2.57796  | -1.50005 |
| C | 2.93066  | 4.33775  | -0.35342 |
| H | 3.16839  | 4.77891  | 0.62486  |
| H | 3.31146  | 5.04638  | -1.10332 |
| C | 1.40612  | 4.22718  | -0.50124 |
| H | 0.99654  | 3.62184  | 0.31698  |
| H | 1.16745  | 3.68962  | -1.42982 |
| C | 0.7256   | 5.60335  | -0.53327 |
| H | 0.96845  | 6.16235  | 0.37941  |
| H | 1.14651  | 6.18144  | -1.36731 |
| C | -0.79666 | 5.58102  | -0.71826 |

|   |          |          |          |
|---|----------|----------|----------|
| H | -1.0651  | 4.95317  | -1.5752  |
| H | -1.15754 | 6.59603  | -0.91616 |
| C | -3.39809 | 5.39282  | 0.37339  |
| H | -3.92925 | 5.41602  | 1.32774  |
| H | -3.42125 | 6.40033  | -0.05287 |
| C | -4.09114 | 4.39261  | -0.55873 |
| H | -5.07211 | 4.79628  | -0.84572 |
| H | -3.52631 | 4.22382  | -1.47804 |
| C | -4.34119 | 3.07135  | 0.14771  |
| C | -4.18403 | 0.69329  | -0.05467 |
| H | -5.09127 | 0.68316  | 0.55458  |
| C | -4.25425 | -0.28808 | -1.21069 |
| H | -3.39421 | -0.09848 | -1.8629  |
| H | -5.1571  | -0.10891 | -1.80471 |
| C | -4.23039 | -1.7754  | -0.77754 |
| C | -2.88061 | -1.02298 | 1.33527  |
| C | -2.95158 | 0.42037  | 0.79301  |
| H | -2.92178 | 1.11575  | 1.63585  |
| H | -2.06911 | 0.61289  | 0.17197  |
| C | -3.99234 | -2.59946 | -2.05714 |
| H | -3.00114 | -2.40835 | -2.47225 |
| H | -4.74175 | -2.31805 | -2.804   |
| H | -4.08778 | -3.67083 | -1.872   |
| C | -5.59603 | -2.20802 | -0.19364 |
| H | -6.3579  | -2.19848 | -0.98049 |
| H | -5.94734 | -1.55829 | 0.6093   |
| H | -5.53061 | -3.22806 | 0.19637  |
| C | -1.47321 | -1.20385 | 1.93533  |
| H | -0.71532 | -1.29496 | 1.15502  |
| H | -1.41552 | -2.09122 | 2.56771  |
| H | -1.2402  | -0.33264 | 2.55607  |
| C | -3.89706 | -1.22883 | 2.48463  |
| H | -3.59828 | -0.63183 | 3.35261  |
| H | -3.91391 | -2.2797  | 2.78876  |

|   |          |          |         |
|---|----------|----------|---------|
| H | -4.91383 | -0.93173 | 2.22413 |
|---|----------|----------|---------|

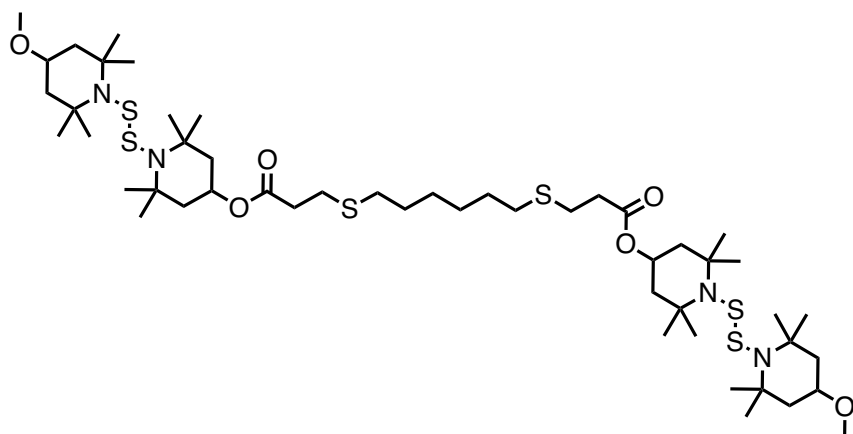

### L(C<sub>6</sub>)-S

| atom | X        | Y        | Z        |
|------|----------|----------|----------|
| S    | -3.15781 | 3.70651  | -2.95979 |
| S    | -7.0029  | 4.85536  | 3.03385  |
| C    | 0.47602  | -6.39433 | -1.2803  |
| C    | -0.25899 | -7.70376 | -1.055   |
| C    | -0.91929 | -7.64499 | 0.31861  |
| C    | -1.91774 | -6.47642 | 0.49309  |
| N    | -1.27118 | -5.18702 | 0.03951  |
| C    | -0.41809 | -5.13567 | -1.20787 |
| S    | -1.90945 | -3.73546 | 0.60297  |
| S    | -3.76049 | -3.11064 | -0.60502 |
| N    | -4.35734 | -1.90115 | 0.43683  |
| C    | -2.23427 | -6.38729 | 1.99794  |
| C    | 0.53426  | -3.92622 | -1.13487 |
| C    | -1.27247 | -5.00032 | -2.48884 |
| O    | 0.71614  | -8.74155 | -1.13956 |
| C    | -4.09004 | -0.48008 | -0.00343 |
| C    | -4.46072 | 0.49465  | 1.13921  |
| C    | -5.83619 | 0.23808  | 1.72114  |
| C    | -5.87725 | -1.17362 | 2.2812   |
| C    | -5.59641 | -2.26364 | 1.22072  |
| C    | -2.58215 | -0.30185 | -0.25899 |
| C    | -5.34476 | -3.57063 | 1.99449  |

|   |          |          |          |
|---|----------|----------|----------|
| C | -6.83052 | -2.46321 | 0.31187  |
| O | -6.03302 | 1.20709  | 2.79175  |
| C | -3.23237 | -6.77216 | -0.26504 |
| C | -4.85354 | -0.11053 | -1.29558 |
| C | -7.31352 | 1.43992  | 3.17404  |
| O | -8.27722 | 0.91885  | 2.6568   |
| C | -7.37831 | 2.37412  | 4.36856  |
| C | -6.48959 | 3.62207  | 4.30493  |
| C | -2.75448 | 2.73827  | -4.4702  |
| C | -1.88802 | 1.53106  | -4.10488 |
| C | -0.46893 | 1.93928  | -3.74471 |
| O | -0.01049 | 1.24219  | -2.68435 |
| O | 0.17779  | 2.76345  | -4.35648 |
| C | 1.3568   | 1.51287  | -2.25893 |
| C | 1.38055  | 2.70277  | -1.31596 |
| C | 2.78202  | 2.99281  | -0.72317 |
| N | 3.36272  | 1.71118  | -0.17453 |
| C | 3.27135  | 0.42771  | -0.95584 |
| C | 1.83753  | 0.27878  | -1.52267 |
| S | 4.496    | 1.84699  | 1.08617  |
| C | 3.48457  | -0.76878 | -0.00934 |
| C | 4.30571  | 0.34749  | -2.10118 |
| C | 2.56249  | 4.00819  | 0.41585  |
| C | 3.69243  | 3.65483  | -1.78347 |
| S | 6.50794  | 2.70776  | 0.53103  |
| N | 7.86024  | 1.73592  | 0.86727  |
| C | 8.23038  | 1.54199  | 2.31767  |
| C | 9.74754  | 1.24717  | 2.42049  |
| C | 10.24388 | 0.15746  | 1.47592  |
| C | 9.90263  | 0.56752  | 0.05399  |
| C | 8.39543  | 0.8109   | -0.19407 |
| C | 8.28856  | 1.49199  | -1.57172 |
| C | 7.63999  | -0.53615 | -0.24698 |
| C | 7.98915  | 2.84413  | 3.10738  |



|   |          |           |          |
|---|----------|-----------|----------|
| C | 7.41062  | 0.41759   | 2.99309  |
| O | 11.6615  | 0.0035    | 1.52998  |
| C | 12.13361 | -0.71743  | 2.64995  |
| C | 0.18284  | -10.03801 | -1.31918 |
| C | -3.93014 | 5.18353   | -3.74775 |
| C | -4.07202 | 6.38899   | -2.80652 |
| C | -5.18129 | 6.32272   | -1.74204 |
| C | -4.90298 | 5.41657   | -0.53416 |
| C | -5.70894 | 4.61781   | 1.74402  |
| C | -5.98766 | 5.5294    | 0.54746  |
| H | 0.97562  | -6.41264  | -2.25427 |
| H | 1.26113  | -6.32414  | -0.51802 |
| H | -1.01458 | -7.86315  | -1.841   |
| H | -0.11791 | -7.55132  | 1.06127  |
| H | -1.45674 | -8.57371  | 0.53881  |
| H | -1.35177 | -6.06914  | 2.56002  |
| H | -3.04508 | -5.68907  | 2.20732  |
| H | -2.534   | -7.37731  | 2.35683  |
| H | 1.07603  | -3.91832  | -0.18495 |
| H | 1.2629   | -4.00345  | -1.94882 |
| H | 0.00525  | -2.97798  | -1.23614 |
| H | -0.61833 | -4.88048  | -3.35931 |
| H | -1.90631 | -5.8706   | -2.66988 |
| H | -1.91426 | -4.11665  | -2.43204 |
| H | -3.72549 | 0.3992    | 1.94684  |
| H | -4.3887  | 1.51658   | 0.75293  |
| H | -6.63274 | 0.39534   | 0.99059  |
| H | -5.12394 | -1.24166  | 3.07523  |
| H | -6.85531 | -1.37364  | 2.72728  |
| H | -2.00247 | -0.61965  | 0.61223  |
| H | -2.24717 | -0.87856  | -1.12252 |
| H | -2.36708 | 0.75357   | -0.45316 |
| H | -4.42197 | -3.50243  | 2.57604  |
| H | -6.17937 | -3.74919  | 2.68018  |

|   |          |          |          |
|---|----------|----------|----------|
| H | -5.26994 | -4.42788 | 1.3234   |
| H | -7.154   | -1.53978 | -0.17271 |
| H | -6.60809 | -3.19871 | -0.46663 |
| H | -7.67443 | -2.8377  | 0.90036  |
| H | -3.7294  | -7.63997 | 0.18224  |
| H | -3.91308 | -5.92036 | -0.20032 |
| H | -3.0709  | -6.99509 | -1.32187 |
| H | -4.5603  | 0.88845  | -1.63636 |
| H | -4.61419 | -0.82609 | -2.08774 |
| H | -5.93736 | -0.10805 | -1.15997 |
| H | -8.42754 | 2.64619  | 4.49926  |
| H | -7.08059 | 1.78171  | 5.24611  |
| H | -6.53083 | 4.13618  | 5.26889  |
| H | -5.44811 | 3.34873  | 4.12197  |
| H | -3.68009 | 2.40654  | -4.9493  |
| H | -2.20181 | 3.37841  | -5.16385 |
| H | -2.32752 | 0.94135  | -3.29732 |
| H | -1.81452 | 0.87529  | -4.98206 |
| H | 1.94173  | 1.71372  | -3.15909 |
| H | 0.68196  | 2.49663  | -0.49648 |
| H | 1.03052  | 3.59926  | -1.8352  |
| H | 1.14401  | 0.07972  | -0.6976  |
| H | 1.81519  | -0.5934  | -2.18488 |
| H | 2.82667  | -0.69457 | 0.86075  |
| H | 3.24597  | -1.69283 | -0.54563 |
| H | 4.51198  | -0.83916 | 0.34833  |
| H | 5.30027  | 0.60022  | -1.7327  |
| H | 4.34057  | -0.67025 | -2.50473 |
| H | 4.07549  | 1.02094  | -2.92873 |
| H | 2.02854  | 3.5491   | 1.25199  |
| H | 3.49937  | 4.41937  | 0.79354  |
| H | 1.9586   | 4.8362   | 0.0306   |
| H | 3.77866  | 3.06904  | -2.70034 |
| H | 3.28493  | 4.6333   | -2.05873 |

|   |          |           |          |
|---|----------|-----------|----------|
| H | 4.69861  | 3.80602   | -1.38434 |
| H | 10.30674 | 2.16061   | 2.18536  |
| H | 9.96602  | 0.99326   | 3.4634   |
| H | 9.77524  | -0.80876  | 1.72264  |
| H | 10.45849 | 1.48636   | -0.16676 |
| H | 10.25335 | -0.19784  | -0.64642 |
| H | 8.73637  | 2.48914   | -1.54473 |
| H | 8.83034  | 0.88934   | -2.30764 |
| H | 7.25687  | 1.5937    | -1.9095  |
| H | 7.92162  | -1.08844  | -1.14999 |
| H | 7.85657  | -1.17718  | 0.60965  |
| H | 6.56299  | -0.36774  | -0.27451 |
| H | 8.44624  | 3.69848   | 2.60139  |
| H | 6.92878  | 3.05768   | 3.24732  |
| H | 8.44781  | 2.74095   | 4.09634  |
| H | 7.63032  | -0.57246  | 2.58929  |
| H | 7.63138  | 0.39325   | 4.06593  |
| H | 6.33938  | 0.59823   | 2.87328  |
| H | 11.94942 | -0.19788  | 3.60152  |
| H | 11.67883 | -1.71882  | 2.71133  |
| H | 13.21314 | -0.83037  | 2.52345  |
| H | -0.40775 | -10.38042 | -0.45705 |
| H | -0.45301 | -10.09623 | -2.21665 |
| H | 1.03057  | -10.71572 | -1.446   |
| H | -3.28398 | 5.46134   | -4.58688 |
| H | -4.90803 | 4.90284   | -4.15549 |
| H | -3.10531 | 6.59254   | -2.32878 |
| H | -4.27884 | 7.25246   | -3.45205 |
| H | -5.34936 | 7.34377   | -1.37391 |
| H | -6.12304 | 6.01804   | -2.21989 |
| H | -4.82013 | 4.37268   | -0.85833 |
| H | -3.92923 | 5.68334   | -0.10028 |
| H | -4.73249 | 4.85184   | 2.18199  |
| H | -5.70196 | 3.56878   | 1.43716  |

|   |          |         |         |
|---|----------|---------|---------|
| H | -6.05721 | 6.57012 | 0.88998 |
| H | -6.96585 | 5.27676 | 0.1191  |

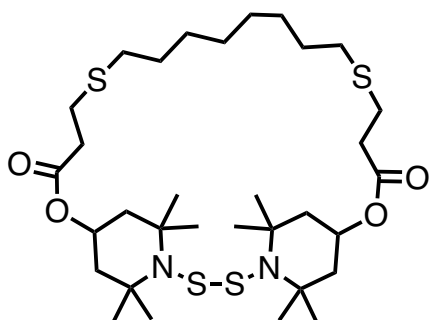

### MM(C<sub>8</sub>)-S

| atom | X        | Y        | Z        |
|------|----------|----------|----------|
| S    | -0.28409 | -4.16106 | 0.86577  |
| S    | -6.53053 | 2.70416  | 0.73697  |
| S    | 4.23875  | 4.32638  | -0.94078 |
| S    | 1.42539  | -4.14911 | -0.44261 |
| O    | -4.1813  | -0.04034 | -0.82606 |
| O    | -6.31453 | -0.78896 | -0.61437 |
| O    | 5.90706  | 1.08952  | -1.30128 |
| O    | 4.87511  | 0.54779  | 0.64325  |
| N    | -1.44124 | -3.00278 | 0.36595  |
| N    | 2.42863  | -2.79749 | -0.12451 |
| C    | -2.53804 | -3.48878 | -0.54946 |
| C    | -3.25657 | -2.26059 | -1.16004 |
| H    | -2.58575 | -1.78104 | -1.88251 |
| H    | -4.139   | -2.60888 | -1.70668 |
| C    | -3.66049 | -1.21286 | -0.13584 |
| H    | -4.45186 | -1.58208 | 0.51924  |
| C    | -2.44269 | -0.75011 | 0.64177  |
| H    | -2.73643 | 0.00158  | 1.38194  |
| H    | -1.75041 | -0.26743 | -0.05818 |
| C    | -1.70764 | -1.90142 | 1.36426  |
| C    | -1.92233 | -4.2642  | -1.72961 |
| H    | -1.13529 | -3.68275 | -2.21426 |
| H    | -2.70574 | -4.47048 | -2.46604 |
| H    | -1.5009  | -5.21986 | -1.41232 |
| C    | -3.54639 | -4.4262  | 0.15513  |

|   |          |          |          |
|---|----------|----------|----------|
| H | -4.16756 | -3.91475 | 0.89208  |
| H | -3.01518 | -5.23928 | 0.65867  |
| H | -4.21948 | -4.8726  | -0.58429 |
| C | -0.3779  | -1.32741 | 1.89135  |
| H | 0.33382  | -1.15487 | 1.08216  |
| H | 0.09118  | -1.99618 | 2.61461  |
| H | -0.5776  | -0.37529 | 2.3939   |
| C | -2.52026 | -2.37881 | 2.59276  |
| H | -2.55221 | -1.58571 | 3.34761  |
| H | -2.04161 | -3.25205 | 3.04568  |
| H | -3.5515  | -2.64209 | 2.35339  |
| C | -5.51994 | 0.04891  | -0.98371 |
| C | -5.9074  | 1.33279  | -1.69504 |
| H | -6.30794 | 1.04836  | -2.67733 |
| H | -5.0235  | 1.94951  | -1.86854 |
| C | -6.99533 | 2.09908  | -0.93453 |
| H | -7.84376 | 1.4342   | -0.75258 |
| H | -7.34983 | 2.94298  | -1.53388 |
| C | -5.23181 | 3.96046  | 0.35922  |
| H | -5.38878 | 4.31471  | -0.66593 |
| H | -5.44074 | 4.80862  | 1.01946  |
| C | -3.79452 | 3.47131  | 0.56785  |
| H | -3.59789 | 2.60904  | -0.07955 |
| H | -3.69458 | 3.10323  | 1.59692  |
| C | -2.74959 | 4.56743  | 0.31441  |
| H | -2.86814 | 4.96216  | -0.70486 |
| H | -2.9372  | 5.41365  | 0.99069  |
| C | -1.3086  | 4.07487  | 0.50188  |
| H | -1.20462 | 3.63588  | 1.50434  |
| H | -1.11113 | 3.25874  | -0.20717 |
| C | -0.25121 | 5.17121  | 0.32231  |
| H | -0.4307  | 5.96961  | 1.05674  |
| H | -0.37077 | 5.63663  | -0.66627 |
| C | 1.18595  | 4.65537  | 0.46859  |

|   |         |          |          |
|---|---------|----------|----------|
| H | 1.38152 | 3.89642  | -0.29869 |
| H | 1.29249 | 4.14454  | 1.4364   |
| C | 2.2389  | 5.7674   | 0.37525  |
| H | 2.1344  | 6.30397  | -0.57683 |
| H | 2.04848 | 6.50777  | 1.16407  |
| C | 3.68796 | 5.28979  | 0.53145  |
| H | 3.78286 | 4.66821  | 1.42896  |
| H | 4.35788 | 6.14901  | 0.64194  |
| C | 5.92926 | 3.84687  | -0.40595 |
| H | 6.46291 | 3.59344  | -1.3247  |
| H | 6.4176  | 4.71758  | 0.04174  |
| C | 5.97173 | 2.64867  | 0.54635  |
| H | 6.99945 | 2.51738  | 0.914    |
| H | 5.33466 | 2.79243  | 1.42192  |
| C | 5.58784 | 1.3611   | -0.16241 |
| C | 4.43945 | -0.72328 | 0.07836  |
| H | 5.25522 | -1.1012  | -0.54245 |
| C | 4.1401  | -1.63563 | 1.25246  |
| H | 3.41178 | -1.12883 | 1.89602  |
| H | 5.04471 | -1.7958  | 1.849    |
| C | 3.56854 | -3.01369 | 0.83928  |
| C | 2.5726  | -1.8315  | -1.27808 |
| C | 3.17957 | -0.51363 | -0.74653 |
| H | 3.396   | 0.1412   | -1.59499 |
| H | 2.44134 | -0.0078  | -0.11309 |
| C | 3.03948 | -3.66963 | 2.12891  |
| H | 2.1904  | -3.11389 | 2.53203  |
| H | 3.83774 | -3.67665 | 2.87826  |
| H | 2.72845 | -4.70233 | 1.96104  |
| C | 4.68103 | -3.92528 | 0.26993  |
| H | 5.40039 | -4.17326 | 1.05776  |
| H | 5.237   | -3.46455 | -0.54832 |
| H | 4.24954 | -4.86175 | -0.09527 |
| C | 1.18688 | -1.48678 | -1.85713 |

|   |         |          |          |
|---|---------|----------|----------|
| H | 0.4677  | -1.26231 | -1.06757 |
| H | 0.78472 | -2.30518 | -2.45622 |
| H | 1.28279 | -0.60979 | -2.50539 |
| C | 3.42802 | -2.39528 | -2.4388  |
| H | 3.37694 | -1.71937 | -3.29877 |
| H | 3.04198 | -3.36931 | -2.75385 |
| H | 4.48185 | -2.51279 | -2.18242 |



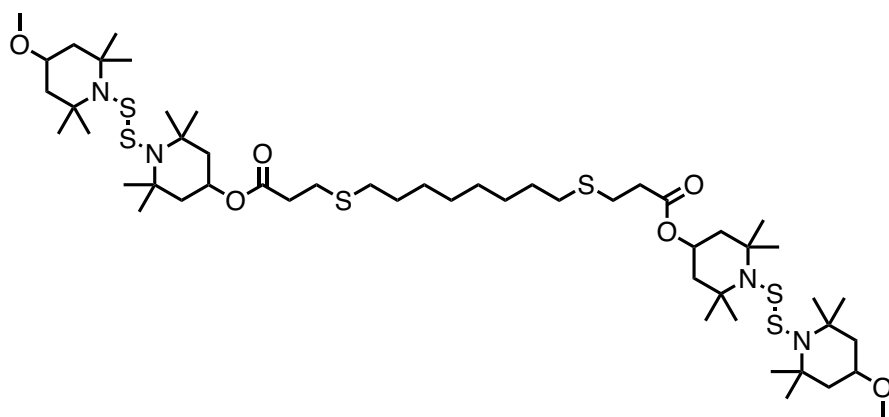

### L(C<sub>8</sub>)-S

| atom | X        | Y        | Z        |
|------|----------|----------|----------|
| S    | -4.3185  | 8.56056  | -0.93347 |
| S    | -9.73808 | -1.21253 | 0.78526  |
| C    | 3.76013  | -4.28674 | -0.5721  |
| C    | 4.21065  | -3.98476 | 0.85229  |
| C    | 3.3456   | -2.86335 | 1.39816  |
| C    | 1.83303  | -3.18432 | 1.41602  |
| N    | 1.41145  | -3.71829 | 0.06442  |
| C    | 2.27422  | -4.7     | -0.69504 |
| S    | -0.21777 | -3.6351  | -0.34199 |
| S    | -1.42102 | -5.35815 | 0.59308  |
| N    | -2.96685 | -4.84101 | 0.09509  |
| C    | 1.10624  | -1.85467 | 1.69275  |
| C    | 1.92454  | -4.64258 | -2.19451 |
| C    | 2.07133  | -6.1525  | -0.20605 |
| O    | 5.57033  | -3.53754 | 0.8926   |
| C    | -3.56198 | -5.59271 | -1.07201 |
| C    | -4.80933 | -4.83606 | -1.58486 |
| C    | -5.78461 | -4.46829 | -0.48419 |
| C    | -5.08136 | -3.58872 | 0.53523  |
| C    | -3.84182 | -4.25305 | 1.17851  |
| C    | -2.55484 | -5.61407 | -2.23686 |
| C    | -3.07318 | -3.13312 | 1.90401  |
| C    | -4.27126 | -5.30585 | 2.22518  |
| O    | -6.85978 | -3.71036 | -1.10803 |

|   |           |          |          |
|---|-----------|----------|----------|
| C | 1.49813   | -4.16749 | 2.56066  |
| C | -3.91947  | -7.05314 | -0.71318 |
| C | -8.09244  | -3.81548 | -0.56538 |
| O | -8.36751  | -4.51124 | 0.38851  |
| C | -9.09597  | -2.98256 | -1.34398 |
| C | -10.23334 | -2.46322 | -0.46343 |
| C | -2.71299  | 7.79408  | -1.37565 |
| C | -1.86081  | 7.38928  | -0.17226 |
| C | -0.5304   | 6.78671  | -0.58718 |
| O | 0.04019   | 6.13497  | 0.44979  |
| O | -0.03598  | 6.88145  | -1.69123 |
| C | 1.3328    | 5.50609  | 0.21369  |
| C | 1.99149   | 5.35847  | 1.57044  |
| C | 3.3586    | 4.6331   | 1.52314  |
| N | 3.2208    | 3.35906  | 0.72517  |
| C | 2.44957   | 3.33496  | -0.572   |
| C | 1.13338   | 4.13044  | -0.39865 |
| S | 4.34649   | 2.13241  | 1.026    |
| C | 2.03882   | 1.88742  | -0.90029 |
| C | 3.26201   | 3.89328  | -1.76281 |
| C | 3.7202    | 4.30218  | 2.9844   |
| C | 4.45133   | 5.57101  | 0.96028  |
| S | 6.37331   | 2.65376  | -0.01004 |
| N | 7.24375   | 1.24184  | -0.31849 |
| C | 7.9638    | 0.60451  | 0.84895  |
| C | 9.10403   | -0.29749 | 0.32211  |
| C | 8.6971    | -1.24938 | -0.78845 |
| C | 8.14793   | -0.42032 | -1.94409 |
| C | 6.92832   | 0.4535   | -1.56654 |
| C | 6.70324   | 1.42248  | -2.74252 |
| C | 5.66677   | -0.42606 | -1.40664 |
| C | 8.63601   | 1.69756  | 1.70311  |
| C | 7.01016   | -0.20109 | 1.76061  |
| O | 9.8722    | -1.97564 | -1.1524  |

|   |          |          |          |
|---|----------|----------|----------|
| C | 9.63802  | -3.11775 | -1.94948 |
| C | 6.52604  | -4.58144 | 0.88724  |
| C | -7.6599  | 5.05842  | -0.13161 |
| C | -8.33239 | 3.91158  | 0.6333   |
| C | -8.58166 | 2.66576  | -0.2267  |
| C | -9.36417 | 0.23644  | -0.28428 |
| C | -9.08373 | 1.46497  | 0.58669  |
| C | -7.43903 | 6.30944  | 0.73025  |
| C | -6.67341 | 7.44949  | 0.03524  |
| C | -5.20861 | 7.10182  | -0.25187 |
| H | 4.36574  | -5.08426 | -1.01646 |
| H | 3.9311   | -3.38141 | -1.16627 |
| H | 4.12201  | -4.8805  | 1.48596  |
| H | 3.5186   | -1.9743  | 0.78079  |
| H | 3.66004  | -2.61278 | 2.41635  |
| H | 1.22081  | -1.16953 | 0.84813  |
| H | 0.04139  | -1.99883 | 1.87848  |
| H | 1.5496   | -1.38665 | 2.57741  |
| H | 1.94427  | -3.61089 | -2.55649 |
| H | 2.66777  | -5.2201  | -2.75408 |
| H | 0.93924  | -5.06038 | -2.40385 |
| H | 2.63864  | -6.84035 | -0.84266 |
| H | 2.40369  | -6.30485 | 0.8228   |
| H | 1.01705  | -6.43518 | -0.26817 |
| H | -4.48879 | -3.91111 | -2.0784  |
| H | -5.30411 | -5.45404 | -2.34162 |
| H | -6.23108 | -5.34622 | -0.01312 |
| H | -4.77075 | -2.6695  | 0.02466  |
| H | -5.77692 | -3.30634 | 1.33152  |
| H | -2.2094  | -4.60387 | -2.47058 |
| H | -1.68536 | -6.23175 | -2.00644 |
| H | -3.04232 | -6.02944 | -3.12493 |
| H | -2.66794 | -2.41469 | 1.18702  |
| H | -3.75777 | -2.60735 | 2.57739  |

|   |           |          |          |
|---|-----------|----------|----------|
| H | -2.24966  | -3.52989 | 2.50008  |
| H | -4.79544  | -4.81889 | 3.05395  |
| H | -4.9413   | -6.06415 | 1.81523  |
| H | -3.3906   | -5.81085 | 2.63268  |
| H | 0.43803   | -4.43262 | 2.54118  |
| H | 2.079     | -5.09098 | 2.51143  |
| H | 1.71075   | -3.6959  | 3.52611  |
| H | -4.233    | -7.59577 | -1.61144 |
| H | -3.04359  | -7.56247 | -0.30125 |
| H | -4.72923  | -7.12555 | 0.01566  |
| H | -8.5737   | -2.17688 | -1.86525 |
| H | -9.51527  | -3.63621 | -2.12249 |
| H | -11.03668 | -2.05071 | -1.08149 |
| H | -10.6442  | -3.28964 | 0.12133  |
| H | -2.89443  | 6.93478  | -2.02864 |
| H | -2.18515  | 8.53851  | -1.97613 |
| H | -1.6565   | 8.26169  | 0.46035  |
| H | -2.37587  | 6.66739  | 0.46838  |
| H | 1.89828   | 6.15874  | -0.45538 |
| H | 1.31039   | 4.79193  | 2.21621  |
| H | 2.13424   | 6.34079  | 2.03245  |
| H | 0.45666   | 3.56721  | 0.25523  |
| H | 0.65531   | 4.22187  | -1.37827 |
| H | 1.57397   | 1.40943  | -0.03343 |
| H | 1.31223   | 1.90253  | -1.71902 |
| H | 2.88774   | 1.27966  | -1.21422 |
| H | 3.41902   | 4.97195  | -1.70223 |
| H | 4.24094   | 3.41248  | -1.81228 |
| H | 2.72974   | 3.69494  | -2.69917 |
| H | 3.04103   | 3.54819  | 3.3914   |
| H | 4.74098   | 3.93179  | 3.08165  |
| H | 3.6274    | 5.21322  | 3.58484  |
| H | 4.56787   | 6.43976  | 1.61745  |
| H | 5.41513   | 5.05637  | 0.9192   |

|   |           |          |          |
|---|-----------|----------|----------|
| H | 4.22281   | 5.94144  | -0.04048 |
| H | 9.91261   | 0.33263  | -0.06727 |
| H | 9.51644   | -0.86391 | 1.16333  |
| H | 7.93664   | -1.96093 | -0.43087 |
| H | 8.96025   | 0.22357  | -2.30246 |
| H | 7.84682   | -1.05909 | -2.78155 |
| H | 7.51762   | 2.14916  | -2.80876 |
| H | 6.67521   | 0.84823  | -3.67434 |
| H | 5.76279   | 1.9674   | -2.65527 |
| H | 5.38653   | -0.84596 | -2.37967 |
| H | 5.80946   | -1.25969 | -0.71635 |
| H | 4.83207   | 0.17626  | -1.04194 |
| H | 9.22925   | 2.36966  | 1.07692  |
| H | 7.90959   | 2.29456  | 2.25538  |
| H | 9.30454   | 1.21745  | 2.42526  |
| H | 6.19971   | 0.43676  | 2.12529  |
| H | 6.56771   | -1.07134 | 1.27289  |
| H | 7.5614    | -0.56032 | 2.63701  |
| H | 8.93068   | -3.81312 | -1.46997 |
| H | 9.24976   | -2.871   | -2.94833 |
| H | 10.599    | -3.62416 | -2.07027 |
| H | 6.38234   | -5.26465 | 1.73805  |
| H | 6.50144   | -5.17433 | -0.03864 |
| H | 7.51026   | -4.1155  | 0.97468  |
| H | -6.70024  | 4.69839  | -0.52551 |
| H | -8.26643  | 5.32563  | -1.00854 |
| H | -9.28462  | 4.25832  | 1.05835  |
| H | -7.70108  | 3.63728  | 1.49036  |
| H | -7.64982  | 2.38657  | -0.73848 |
| H | -9.30388  | 2.90672  | -1.01919 |
| H | -8.49187  | 0.01493  | -0.9088  |
| H | -10.21722 | 0.42221  | -0.94716 |
| H | -9.99441  | 1.73609  | 1.13485  |
| H | -8.33187  | 1.20734  | 1.34392  |

|   |          |         |          |
|---|----------|---------|----------|
| H | -8.41514 | 6.69204 | 1.05577  |
| H | -6.9046  | 6.02802 | 1.64885  |
| H | -7.17468 | 7.72158 | -0.902   |
| H | -6.7066  | 8.33952 | 0.67525  |
| H | -4.7203  | 6.77482 | 0.67272  |
| H | -5.13286 | 6.28882 | -0.98118 |

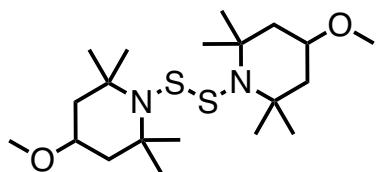

### BiTEMPS-diOMe

| atom | X        | Y        | Z        |
|------|----------|----------|----------|
| S    | -0.59121 | 0.10269  | 0.91288  |
| N    | -2.24392 | 0.11931  | 0.60267  |
| C    | -2.86812 | 1.4318   | 0.18371  |
| C    | -4.39151 | 1.3886   | 0.43995  |
| C    | -5.0835  | 0.14744  | -0.09534 |
| C    | -4.44103 | -1.07155 | 0.55859  |
| C    | -2.91997 | -1.20035 | 0.30749  |
| C    | -2.3075  | 2.57034  | 1.05718  |
| C    | -2.40097 | -2.27302 | 1.284    |
| C    | -2.64751 | -1.68488 | -1.13513 |
| O    | -6.46535 | 0.27031  | 0.23791  |
| C    | -7.32372 | -0.59041 | -0.48266 |
| C    | -2.57623 | 1.76787  | -1.29658 |
| C    | 2.1447   | 2.36624  | 0.18477  |
| O    | 6.13664  | -0.31136 | 1.17744  |
| C    | 1.91355  | -2.46614 | 0.29461  |
| C    | 3.20915  | -1.88701 | -1.76516 |
| C    | 3.37686  | 1.57369  | -1.84257 |
| C    | 2.85528  | -1.4222  | -0.33382 |
| C    | 4.12035  | -1.37778 | 0.5514   |
| C    | 5.03646  | -0.19838 | 0.27555  |
| C    | 4.23855  | 1.08238  | 0.49857  |
| C    | 2.98151  | 1.20945  | -0.39287 |
| N    | 2.18147  | -0.06984 | -0.32326 |
| S    | 0.63333  | -0.01004 | -1.03175 |
| C    | 7.25955  | 0.47586  | 0.83784  |
| H    | -4.5788  | 1.42932  | 1.51961  |
| H    | -4.84477 | 2.28374  | 0.0019   |

|   |          |          |          |
|---|----------|----------|----------|
| H | -4.98742 | 0.0938   | -1.19169 |
| H | -4.62448 | -0.99598 | 1.63709  |
| H | -4.91243 | -1.99881 | 0.21534  |
| H | -2.3889  | 2.31883  | 2.11832  |
| H | -1.26148 | 2.78363  | 0.8345   |
| H | -2.89047 | 3.47833  | 0.87153  |
| H | -2.47181 | -1.92138 | 2.31708  |
| H | -3.01641 | -3.17293 | 1.18219  |
| H | -1.36371 | -2.54411 | 1.08446  |
| H | -3.06401 | -2.68876 | -1.27312 |
| H | -3.09422 | -1.03623 | -1.8915  |
| H | -1.57265 | -1.73857 | -1.32586 |
| H | -8.34586 | -0.33897 | -0.18919 |
| H | -7.22378 | -0.44849 | -1.57038 |
| H | -7.15088 | -1.65299 | -0.2579  |
| H | -2.95394 | 2.76941  | -1.52935 |
| H | -1.49985 | 1.76332  | -1.48743 |
| H | -3.04785 | 1.06923  | -1.99081 |
| H | 1.77519  | 2.11626  | 1.18246  |
| H | 2.77132  | 3.26107  | 0.25979  |
| H | 1.28987  | 2.60292  | -0.45116 |
| H | 1.56832  | -2.13373 | 1.27675  |
| H | 1.04116  | -2.65326 | -0.33398 |
| H | 2.45447  | -3.41027 | 0.41632  |
| H | 3.58921  | -2.914   | -1.74426 |
| H | 2.31664  | -1.87115 | -2.39736 |
| H | 3.97138  | -1.26249 | -2.23635 |
| H | 3.85662  | 2.55814  | -1.86683 |
| H | 4.07131  | 0.85607  | -2.28473 |
| H | 2.48536  | 1.61879  | -2.47468 |
| H | 3.82305  | -1.32349 | 1.6053   |
| H | 4.67203  | -2.31454 | 0.42107  |
| H | 5.42031  | -0.24013 | -0.75657 |
| H | 3.93694  | 1.09755  | 1.5526   |



|   |         |         |          |
|---|---------|---------|----------|
| H | 4.85766 | 1.96968 | 0.32698  |
| H | 8.04645 | 0.23486 | 1.55684  |
| H | 7.62589 | 0.24783 | -0.17572 |
| H | 7.05812 | 1.55554 | 0.89482  |

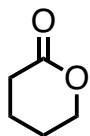

| atom | X        | Y        | Z        |
|------|----------|----------|----------|
| C    | -0.34918 | 1.28667  | 0.11278  |
| C    | 1.12664  | 1.19911  | -0.2899  |
| C    | 1.73427  | -0.06411 | 0.32077  |
| C    | 0.96412  | -1.27812 | -0.17488 |
| O    | -0.46178 | -1.19416 | 0.04283  |
| C    | -1.13817 | -0.0147  | 0.0109   |
| O    | -2.34507 | -0.03628 | -0.01511 |
| H    | -0.89966 | 2.03636  | -0.46078 |
| H    | -0.42787 | 1.58851  | 1.16618  |
| H    | 1.66102  | 2.09791  | 0.03443  |
| H    | 1.21688  | 1.15458  | -1.38308 |
| H    | 2.78849  | -0.17955 | 0.04493  |
| H    | 1.68827  | -0.01451 | 1.41609  |
| H    | 1.12819  | -1.4184  | -1.25155 |
| H    | 1.2734   | -2.19456 | 0.33397  |

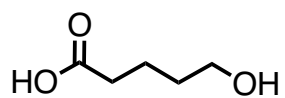

| atom | X        | Y        | Z        |
|------|----------|----------|----------|
| C    | -0.9821  | -0.63413 | 0.00016  |
| C    | 0.22035  | 0.31009  | -0.00026 |
| C    | 1.55421  | -0.44299 | 0.00017  |
| C    | 2.75833  | 0.48963  | -0.00025 |
| O    | -3.35137 | -0.77626 | -0.00023 |
| C    | -2.3086  | 0.09248  | -0.00002 |
| O    | -2.46507 | 1.29372  | 0.00029  |
| O    | 3.93337  | -0.3136  | 0.00017  |
| H    | -0.96743 | -1.30031 | -0.87208 |
| H    | -0.96734 | -1.29956 | 0.87297  |
| H    | 0.15664  | 0.96888  | 0.87385  |
| H    | 0.15673  | 0.96801  | -0.87503 |
| H    | 1.62422  | -1.09648 | -0.87871 |
| H    | 1.62415  | -1.0956  | 0.87972  |
| H    | 2.7208   | 1.14421  | 0.88629  |
| H    | 2.72085  | 1.14335  | -0.88744 |
| H    | -4.15523 | -0.22948 | -0.00014 |
| H    | 4.69804  | 0.27561  | -0.00003 |

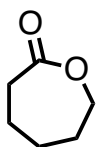

| atom | X        | Y        | Z        |
|------|----------|----------|----------|
| C    | -0.98792 | 1.34956  | -0.26626 |
| C    | 0.53555  | 1.631    | -0.29477 |
| C    | 1.38914  | 0.74935  | 0.65012  |
| C    | 1.76153  | -0.63888 | 0.08312  |
| C    | 0.57927  | -1.58883 | -0.11512 |
| O    | -0.46336 | -0.90907 | -0.84777 |
| C    | -1.25642 | -0.12121 | -0.04074 |
| O    | -2.009   | -0.58239 | 0.78018  |
| H    | -1.44308 | 1.66003  | -1.21443 |
| H    | -1.4897  | 1.89887  | 0.53459  |
| H    | 0.68341  | 2.68434  | -0.0325  |
| H    | 0.90913  | 1.50962  | -1.31698 |
| H    | 2.32453  | 1.27977  | 0.86143  |
| H    | 0.88231  | 0.63759  | 1.61904  |
| H    | 2.48674  | -1.12587 | 0.74817  |
| H    | 2.26521  | -0.49655 | -0.88133 |
| H    | 0.1722   | -1.94393 | 0.83862  |
| H    | 0.86119  | -2.45816 | -0.71399 |

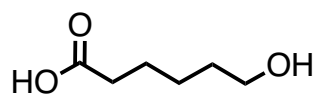

| atom | X        | Y        | Z        |
|------|----------|----------|----------|
| C    | -1.61974 | -0.64003 | 0.00014  |
| C    | -0.37923 | 0.25377  | -0.00014 |
| C    | 0.92667  | -0.54913 | 0.00015  |
| C    | 2.17411  | 0.34124  | -0.00014 |
| O    | -3.99289 | -0.6894  | -0.00027 |
| C    | -2.91663 | 0.13833  | 0.00003  |
| O    | -3.02649 | 1.34448  | 0.00023  |
| C    | 3.47355  | -0.45322 | 0.00015  |
| O    | 4.5546   | 0.47253  | -0.00016 |
| H    | -1.63302 | -1.30619 | -0.87232 |
| H    | -1.63294 | -1.3057  | 0.87299  |
| H    | -0.41203 | 0.91465  | 0.87368  |
| H    | -0.41198 | 0.91408  | -0.87439 |
| H    | 0.94786  | -1.21098 | -0.87767 |
| H    | 0.94783  | -1.21039 | 0.87841  |
| H    | 2.16944  | 0.99784  | 0.87867  |
| H    | 2.16947  | 0.99724  | -0.87939 |
| H    | -4.77438 | -0.11111 | -0.00025 |
| H    | 3.50844  | -1.10832 | -0.88653 |
| H    | 3.50842  | -1.10771 | 0.88729  |
| H    | 5.37879  | -0.03005 | -0.00002 |

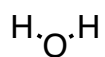

| atom | X        | Y        | Z |
|------|----------|----------|---|
| O    | 0        | 0.11917  | 0 |
| H    | 0.75938  | -0.47669 | 0 |
| H    | -0.75938 | -0.47669 | 0 |

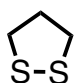

| atom | X        | Y        | Z        |
|------|----------|----------|----------|
| C    | -0.47242 | -1.52632 | 0.42287  |
| C    | -1.66908 | -0.75581 | -0.14694 |
| C    | -1.66909 | 0.7558   | 0.14694  |
| C    | -0.47243 | 1.52632  | -0.42287 |
| S    | 1.13142  | 1.00015  | 0.31445  |
| S    | 1.13142  | -1.00015 | -0.31445 |
| H    | -0.55277 | -2.59303 | 0.18768  |
| H    | -0.40515 | -1.41998 | 1.51001  |
| H    | -1.71058 | -0.91875 | -1.23097 |
| H    | -2.58519 | -1.19078 | 0.27361  |
| H    | -2.58519 | 1.19077  | -0.27361 |
| H    | -1.71058 | 0.91875  | 1.23097  |
| H    | -0.40515 | 1.41998  | -1.51001 |
| H    | -0.55278 | 2.59303  | -0.18768 |

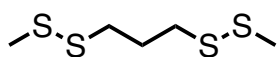

| atom | X        | Y        | Z        |
|------|----------|----------|----------|
| C    | -1.25512 | -0.19422 | -0.13369 |
| C    | 0.00002  | 0.67558  | -0.00006 |
| C    | 1.25519  | -0.19426 | 0.13293  |
| S    | 2.73633  | 0.89951  | 0.323    |
| S    | -2.73636 | 0.89962  | -0.32258 |
| S    | -4.29482 | -0.45564 | -0.57328 |
| C    | -4.82662 | -0.81891 | 1.14634  |
| S    | 4.29476  | -0.45585 | 0.57333  |
| C    | 4.8267   | -0.81848 | -1.14637 |
| H    | -1.1953  | -0.84185 | -1.01237 |
| H    | -1.38789 | -0.82089 | 0.75285  |
| H    | -0.09209 | 1.32671  | 0.87686  |
| H    | 0.09209  | 1.32739  | -0.87647 |
| H    | 1.38813  | -0.82011 | -0.75417 |
| H    | 1.1953   | -0.8427  | 1.01101  |
| H    | -5.68646 | -1.48925 | 1.05742  |
| H    | -4.03834 | -1.32176 | 1.70925  |
| H    | -5.13148 | 0.09577  | 1.65646  |
| H    | 5.6863   | -1.48915 | -1.05764 |
| H    | 4.03833  | -1.32081 | -1.70965 |
| H    | 5.13193  | 0.09633  | -1.65601 |

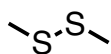

| atom | X        | Y        | Z       |
|------|----------|----------|---------|
| C    | -0.98404 | 1.64447  | 0.79733 |
| S    | -0.98404 | 0.34023  | -0.4949 |
| S    | 0.98404  | -0.34023 | -0.4949 |
| C    | 0.98404  | -1.64447 | 0.79733 |
| H    | -1.99083 | 2.07219  | 0.79068 |
| H    | -0.78045 | 1.22635  | 1.78476 |
| H    | -0.25794 | 2.42286  | 0.559   |
| H    | 1.99083  | -2.07219 | 0.79068 |
| H    | 0.78045  | -1.22635 | 1.78476 |
| H    | 0.25794  | -2.42286 | 0.559   |

[1] D. Sathe, J. Zhou, H. Chen, H. W. Su, W. Xie, T. G. Hsu, B. R. Schrage, T. Smith, C. J. Ziegler, J. Wang, *Nat. Chem.* **2021**, *13*, 743–750.

[2] CrystalStructure 4.3: Crystal Structure Analysis Package, Rigaku Corporation, Tokyo 196-8666, Japan, **2000–2018**.

[3] G. M. Sheldrick, *Acta Crystallogr., Sect. A* **2015**, *71*, 3–8.

[4] G. M. Sheldrick, *Acta Crystallogr., Sect. C* **2015**, *71*, 3–8.
